1 **Luminal progenitors undergo partial epithelial-to-mesenchymal transition at the onset of**  
2 **basal-like breast tumorigenesis**

3

4 Camille Landragin<sup>1,2,\*</sup>, Melissa Saichi<sup>1,2,\*</sup>, Pacôme Prompsy<sup>1,2</sup>, Adeline Durand<sup>1,2</sup>, Jérémy Mesple<sup>3</sup>,  
5 Amandine Trouchet<sup>1,4</sup>, Marisa Faraldo<sup>5,6</sup>, Hélène Salmon<sup>3</sup>, Céline Vallot<sup>1,2,4</sup>

6

7 Affiliations:

8 1 CNRS UMR3244, Institut Curie, PSL University, Paris, France

9 2 Translational Research Department, Institut Curie, PSL University, Paris, France

10 3 INSERM U932, Institut Curie, PSL University, Paris, France

11 4 Single Cell Initiative, Institut Curie, PSL University, Paris, France

12 5 CNRS UMR3215, Institut Curie, PSL University, Paris, France

13 6 INSERM U934, Institut Curie, PSL University, Paris, France

14 \* co-first authors

15

16 Correspondence should be addressed to: [celine.vallot@curie.fr](mailto:celine.vallot@curie.fr)

17

18

19

20

## 21 **SUMMARY**

22 Defects in double-strand repair mechanisms - both through germline or somatic inactivation of repair  
23 genes - is a hallmark of basal-like breast cancers. In this genetically-unstable context, a recurrent shift  
24 in cell identity occurs within the mammary epithelium. Basal-like tumors have indeed been proposed  
25 to originate from luminal progenitor (LP) cells yet tumor-initiating events remain poorly understood.  
26 Here, we map state transitions at the onset of basal-like tumorigenesis, using a Brca-1 deficient mouse  
27 model launching tumorigenesis in multiple LP cells. Combining single-cell transcriptomics to spatial  
28 multiplex imaging, we identify a population of cycling p16-expressing cells, emerging from the luminal  
29 progenitor compartment, undergoing partial epithelial-to-mesenchymal transition and losing luminal  
30 identity. Pseudo-temporal analyses position these cells as a transitory pre-tumoral state between  
31 aberrant Brca1-deficient luminal progenitors and growing tumor cells. In patients, the p16 pre-tumoral  
32 signature is found in early stage basal-like tumors, that rarely recur. Concomitant to p16 activation, we  
33 show that LP cells undergo an epigenomic crisis attested by the general re-organization of their  
34 heterochromatin. They accumulate multiple H3K27me3 micro-foci - reminiscent of the formation of  
35 senescence-associated heterochromatin foci (SAHF) - and lose their inactive X (Xi). Both p16 activation  
36 and heterochromatin reorganization are hallmarks of human basal-like breast tumors; we propose that  
37 these events occur during initial LP transformation and are scars of an initial transitory senescent-like  
38 state.

39

40

41

42

43

44

45

## 46 INTRODUCTION

47 Triple-negative breast cancer (TNBC) refers to a subgroup of aggressive breast cancers defined by the  
48 lack of estrogen receptor (ER), progesterone receptor (PR), and human epidermal growth factor  
49 receptor 2 (HER2) accounting for 15–20% of all breast tumors (Onitilo et al. 2009). Along with  
50 transcriptional heterogeneity, TNBC is characterized by complex genomes, dictated by high genetic  
51 instability and complex patterns of copy number alterations and chromosomal rearrangements (Gao  
52 et al. 2016; Engebraaten, Vollan, and Børresen-Dale 2013). Defects in double-stranded DNA repair  
53 mechanisms are indeed characteristic of TNBC, as a result of either germline or somatic mutations in  
54 BRCA1/2 and other genes involved in DNA repair (Timms et al. 2014; Stefansson et al. 2011). In this  
55 genetically unstable context, there is a chaotic de-structuration of the mammary gland, with recurrent  
56 loss of proper cell identity. Part of these cancers harbor basal-like phenotypes, expressing an  
57 incomplete set of basal markers but with high intra-tumor heterogeneity (Marra et al. 2020; Bianchini  
58 et al. 2016). Interestingly, BRCA1-deficient tumors are suspected to originate from HDR-deficient  
59 luminal progenitor cells of the gland, implicating a recurrent switch or loss in cell identity during  
60 tumorigenesis (Molyneux et al. 2010; E. Lim et al. 2009). Recent data indicate that Brca1-deficiency in  
61 the mammary gland induces aberrant alveolar differentiation of luminal progenitors, suggesting early  
62 phenotypic defects in the mammary gland of a Brca1-deficient individual (Bach et al. 2021). However,  
63 the tumor-initiating events leading to the emergence of tumor cells per se remain unknown.

64 Studying early steps of tumorigenesis is not feasible solely based on human tumor samples, which are  
65 complex stacks of molecular alterations acquired over time. Animal models enable the isolation of a  
66 continuum of states from normal to pathologic gland to precisely map the evolution of the  
67 physiological mammary gland towards tumorigenesis. In the case of basal-like breast cancers, models  
68 with Brca1/Trp53 deficiency in luminal progenitors have been shown to mimic formation of human  
69 basal-like breast cancers (Selbert et al. 1998; Molyneux et al. 2010). *TP53* mutations remain the most  
70 common genetic alteration in basal-like cancers (85%, (Cancer Genome Atlas Network 2012)). In  
71 *BRCA1*-germline carriers, *TP53* mutation was actually shown to be among the earliest events in tumor

72 formation (Martins et al. 2012). In this context, a mouse model with conditional deletion of *Trp53* and  
73 *Brca1* in the luminal compartment of the mammary gland appears as an apropos model to catch the  
74 rare transforming events leading an HDR-deficient luminal progenitor to tumorigenesis. In contrast to  
75 humans, where these events are extremely rare, the deletion in the mouse of these genes in multiple  
76 cells of the mammary glands greatly enhances our ability to detect the transitioning states from  
77 aberrant luminal progenitor to basal-like breast cancer phenotype.

78

79 Here, using single-cell transcriptomics and multiplex imaging in a Blg-Cre *Trp53*<sup>Fl/Fl</sup> and *Brca1*<sup>Fl/Fl</sup> mouse  
80 model, we mapped steps of *Brca1*-tumorigenesis *in vivo*, with a focus on epithelial cells to catch rare  
81 pre-tumoral epithelial states. We identified an intermediate population of cells, expressing p16,  
82 transitioning from luminal progenitor to tumor phenotype, with highly remodeled genomes. These  
83 cells are partially switching to a mesenchymal phenotype while retaining their epithelial characteristics  
84 and activating angiogenesis. We furthermore discovered that LPs concomitantly undergo a major  
85 epigenomic crisis with a disruption of their heterochromatin through the accumulation of multiple  
86 heterochromatin foci and loss of their Xi, a hallmark of basal-like breast tumors. Using TCGA data, we  
87 further show that the p16-associated pre-tumoral signature is found in basal-like cancers with rare  
88 recurrence. We propose that p16 activation and heterochromatin disruption could be scars of an early  
89 senescence-like transitory state in the basal-like tumorigenesis process.

90

91

## 92 RESULTS

### 93 Monitoring mammary tumorigenesis with scRNA-seq *in vivo*

94 Virgin Blg-Cre Trp53<sup>fl/fl</sup> Brca1<sup>fl/fl</sup> females develop mammary tumors at a median age of 5.2 months (Fig.  
95 S1A). These tumors display a complete de-structuration of the mammary gland, with high intra-  
96 tumoral heterogeneity: 72% of cells express neither the canonical basal marker Krt5 nor the luminal  
97 marker Krt8, 17% are positive for Krt8 only, 0,2% for Krt5 only whereas 11% of cells expressed both  
98 markers, revealed by immunofluorescent staining (Fig. S1B). In order to delineate the steps leading to  
99 such destructuration, we profiled mammary epithelium from animals at various time points (2.7, 3.2  
100 and 5.2 months, n=12), as well as from three tumors (Fig. 1A, n=15 mice in total). To maximize our  
101 chances of identifying tumor-initiating cells, among the n=15 mice, we profiled the mammary  
102 epithelium of 2 mice at 5.2 months of age, with no apparent tumor, but belonging to a litter of an  
103 animal with a tumor. Among these individuals at 5.2 months of age, we observed multiple lesions - less  
104 than 0,5 mm - within the mammary epithelium (Fig. 1A). Part of the collected samples were enriched  
105 for epithelial fraction to further increase our chances of identifying rare phenotypic states within the  
106 Brca1/Trp53 deficient mammary epithelium (see Methods), on which scRNA-seq was performed using  
107 10X technology.

108 We collected 17,330 high-quality cells in total on which we applied unsupervised graph-based  
109 clustering followed by dimension reduction methods to identify cell populations. We conducted a  
110 coarse-grained cluster annotation using well-established canonical markers and identified four major  
111 cell compartments - *immune cells*, *fibroblasts*, *endothelial* and *epithelial* cells (see Methods, Fig. S1C-  
112 F). As our focus was on epithelial cells, we performed a high-resolution sub-clustering on the epithelial  
113 compartment (n=11,113 cells, Fig. 1B-C). Top expressed genes per cluster were intersected with a set  
114 of known markers of physiological cell populations of the mammary gland (Bach et al. 2021, 2017;  
115 Watson and Khaled 2008) (Fig. 1C and Fig. S1F). In the case of clusters composed with cells from either  
116 tumor or lesional samples, we labeled them by concatenating the top expressed gene per cluster, with  
117 the major sample name which composes the cluster (Fig. 1C and Fig. S1F).

118 With the objective to map cells undergoing early steps of Brca1-tumorigenesis, we focused on the  
119 epithelial sub-compartment prior to tumor detection (Fig. 1C-D, n= 1,706 cells). In 2.7-, 3-, and 5.2-  
120 month samples, we identified physiological cell populations of the mammary gland: basal cells (*Krt5*)  
121 and clusters of luminal cells (*Krt8*) - luminal hormone-sensing (Luminal H-S, *Prlr*), luminal progenitor  
122 (LP, *Aldh1a3*) and secretory alveolar cells (*Avd*, *Csn2*), with low batch effect within controls (Fig. 1B).  
123 The abnormal presence of secretory alveolar cells in the mammary gland of virgin mice at all timepoints  
124 (Fig. S1G), confirmed the abnormal differentiation of luminal progenitors into alveolar cells in  
125 Brca1/Trp53 deficient mammary glands, which had recently been observed during Brca1  
126 tumorigenesis (Bach et al. 2021).

127

#### 128 **Identification of a p16-high cycling population of luminal cells with mesenchymal markers**

129 Apart from these expected cell populations, we identified a cluster of cells, in between normal luminal  
130 compartments (LP & Avd) and tumor cells (Fig. 1C-D), characterized by an unequivocal activation of  
131 *Cdkn2a/p16* compared to both LP and Avd (adj. p-value < 2.5e-47, Fig. 1E, Table S1). This partition  
132 originated mainly from pre-tumoral glands with lesions (at 5.2 months of age) (Fig. S1G, adj.p value <  
133 0.05, Fisher's test), but few cells also belonged to mammary glands of 2.7 and 3 month-old animals. As  
134 opposed to epithelial cells from the healthy virgin mice individuals (2.7 & 3.2 months), cells from p16+  
135 cluster are cycling just-like tumor cells (Fig. 1F), implying they have by-passed the cell-cycle blockade  
136 imposed by p16. In line with p16 activation - a marker of senescence (Collado and Serrano 2010;  
137 Koppelstaetter et al. 2008; Di Micco et al. 2021; Campisi and d'Adda di Fagagna 2007) - the  
138 transcriptional profile of these cells is significantly enriched for senescence-related hallmark signatures  
139 (REACTOME\_Senescence Associated Secretory Phenotype, adj. p-value < 2.0 10<sup>-2</sup>). In addition, cells  
140 from p16+ cluster express a pro-senescence secreted factor, *Igfbp4* (adj. p-value =3.3 10<sup>-23</sup>), that can  
141 trigger senescence in neighboring cells (Severino et al. 2013). Our data suggest that these cells, now  
142 cycling, may have previously undergone a G1/S blockade and senescence-like state (Buj et al. 2021;  
143 Herranz and Gil 2018). Combined over-expression in these cells of *Cdk4* and *Ccnd1* (adj. p-value<2.0

144  $10^{-5}$ ), that together promote G1 to S transition, could for example help the cells bypass cycle arrest  
145 imposed by p16 overexpression (Roupakia, Markopoulos, and Kolettas 2021).  
146 In terms of identity, these cells show a significant down-regulation of genes characteristic of luminal  
147 identity, compared to LP and Avd cells - e.g *Krt8*, *Krt18*, *Csn2* (Pervolarakis et al. 2020; Bach et al. 2017)  
148 (Fig. 1G). In addition to the repression of epithelial cytokeratins, a series of transcriptional changes  
149 testify of dampened epithelial characteristics and acquisition of mesenchymal features: (i)  
150 upregulation of *Vim*, *Fn1* and *Sparc* (adj. p-value <  $1.5e-17$ , Table S1), indicative of changes in  
151 cytoskeleton and extracellular matrix, and (ii) down-regulation of *Cdh1* and several Claudin genes  
152 (*Cldn4*, 3 and 1, adj. p-value <  $3.0 \cdot 10^{-8}$ , Table S1), indicative of the dissolution of adherens and tight  
153 junctions. Part of the transcriptional changes could be driven by the transcriptional factor Twist1, that  
154 is significantly over-expressed in cells from the p16+ cluster (adj. p-value=  $3.0 \cdot 10^{-14}$ ,  $\log_2FC=0.45$ ), and  
155 is a known activator of *Fn1* and *Sparc*, and repressor of Claudins and E-cadherin genes (Lamouille, Xu,  
156 and Derynck 2014), (Fig. 1H, Fig S1H, Table S1). In addition, cells from p16+ cluster display a specific  
157 downregulation of *Lmna* (Fig. 1H), indicative of diminished nuclear stiffness, potentially increasing  
158 their migration potential (Harada et al. 2014). Altogether, we have identified a population of luminal  
159 cells expressing several mesenchymal markers, thereby potentially undergoing a partial EMT  
160 (Pastushenko et al. 2018), while aberrantly expressing p16, that we define as a 'p16 pre-tumoral' state.  
161 The signature of such pre-tumoral state is further kept in tumor cells, as several EMT and senescence-  
162 related genes remain over-expressed in tumor cells (see ST sample, Fig. 1G-H and Fig. S1H).

163

#### 164 **p16 pre-tumoral state: a transition between luminal progenitor and tumor states**

165 We then sought to reconstitute the timeline of events, and better characterize the transformation  
166 from the luminal to tumor state using our single-cell transcriptomics datasets. In order to investigate  
167 the presence of a potential continual progression in the epithelial compartment (Fig. 1D), we applied  
168 Potential of Heat-diffusion for Affinity-based Trajectory Embedding (PHATE); a non-linear dimension  
169 reduction known to efficiently retrieve high-dimensional trajectory structures without specifying any

170 root state (Moon et al. 2019) (Fig. 2A). The non-linear progression between the luminal towards the  
171 tumor cells was apparent in the PHATE two-dimensional space (Fig. 2A). p16 pre-tumoral cells were  
172 the intermediate between the two pools of cells (normal-like and tumoral), and represented a “bridge”  
173 between the two cell populations (Fig. 2A). We further mapped and quantified connections between  
174 cell states by performing unsupervised Partition-based Graph Abstraction (PAGA) (Wolf et al. 2019)  
175 analysis on the same dataset. According to PAGA representation, the topology of the graph showed  
176 that the p16 pre-tumoral node was the most connected, and tumor cell nodes were only reachable  
177 through this central hub (Fig. 2B). The highest connectivity score was between the LP and Avd  
178 partitions (0.8), corroborating the previously described abnormal LP differentiation to Avd (Bach et al.  
179 2021). The second and third most connected nodes were between the LP and p16 pre-tumoral, and  
180 Avd with p16 pre-tumoral partitions respectively, suggesting that the transient p16 pre-tumoral state  
181 may arise from either population (Fig. 2B).

182

183 To decipher the origin of this transient population, semi-supervised pseudotime inference was  
184 conducted using the Slingshot algorithm (Street et al. 2018). We hypothesized that either luminal  
185 progenitors or alveolar cells could be the starting point, and thus iteratively set them as the root of the  
186 tree (Fig. S2A-B). In both scenarios, whatever the root, reaching the ST tumor clusters passes through  
187 the p16 pre-tumoral state (Fig. S2A-B). However, when the Avd was set as the root, the algorithm  
188 suggested a lineage form Avd to LP, and from Avd to Luminal H-S, which were both biologically  
189 irrelevant (Cristea and Polyak 2018; Visvader and Stingl 2014). Therefore, we chose the LP population  
190 as the root of the tree, and selected the longest lineage path to reach the Fgf8+ ST cluster (Fig. 2C).  
191 Altogether, these complementary approaches model that LP cells switch to a p16 pre-tumoral state  
192 prior to tumor formation and growth.

193 Hereafter, to identify the biological pathways driving this state transition, we studied the top genes  
194 correlated to pseudotime values (Fig. S2C; Methods), on which consecutive MsigDB hallmark (Liberzon  
195 et al. 2015) pathway enrichment and signature quantification were performed (see Methods). In Fig.



196 2D-E, we display the most significantly enriched pathways, and transcriptional scores are plotted along  
197 pseudotime. While transitioning from LP to tumor state, p16 pre-tumoral cells activate a  
198 transcriptional signature associated with angiogenesis and EMT, while inhibiting pathways of  
199 apoptosis and estrogen response (Fig. 2D-E). All these four pathway score levels were maintained in  
200 all tumor cells (Fig. S2D). Such signatures endorse the pre-tumoral nature of the p16 pre-tumoral state:  
201 angiogenesis and inhibition of apoptosis are canonical hallmarks of cancer cells (Hanahan and  
202 Weinberg 2016) - meant to enable fast growth of cells, while EMT activation has already been  
203 proposed as a mechanism to escape cell cycle arrest *in vitro* (Ansieau et al. 2008; Fridman and Tainsky  
204 2008).

205

#### 206 **p16 pre-tumoral signature is specific to basal-like human cancers that rarely recur**

207 We next investigated whether we could detect such transcriptional changes in human breast cancers,  
208 and if so which ones. We took advantage of the largest, publicly available, breast pan-cancer bulk  
209 RNAseq cohort in TCGA (Berger et al. 2018), to investigate transcriptional similarities between the p16  
210 pre-tumoral state and human breast cancer subtypes. Normalized *CDKN2A*/p16 expression level was  
211 the highest in basal-like subtype samples (n=171), as compared to the remaining breast cancer  
212 subtypes (Fig. 3A), shown that p16 activation is specific to the basal-like cancers, not only BRCA1-  
213 deficient basal-tumors, and a frequent event in this subtype (n=128, 75% from the total basal-like  
214 samples). Cross-comparison between the top markers of the basal-like subtype in humans and the top  
215 markers of the p16 pre-tumoral cells highlighted the over-expression of EMT-related genes in both  
216 populations (*SLPI*, *COL2A1*, *SERPINE2* and *SPP1*) (Fig. S3A). Similarly, *CDKN2A* was the top  
217 overexpressed gene in both comparisons, whereas *CSN2* was the top down-regulated gene (Fig. S3A).  
218 Altogether, these observations endorse the transcriptional similarity between the p16 pre-tumoral  
219 mouse cells and basal-like breast cancers in humans. We further defined a p16 pre-tumoral associated  
220 signature, as the top over-expressed genes ( $\log_2FC > 0.8$  and adj. p-value  $< 0.05$ ) in the p16 high cluster  
221 identified above as compared to both LP and Avd compartments (see Methods). We calculated a p16

222 pre-tumoral signature score for each sample and observed that basal-like tumors displayed higher  
223 scores than other breast cancer subtypes (Fig. 3B); among basal-like tumors, *BRCA1* deficient tumors  
224 displayed slightly higher scores than *BRCA1* WT tumors.

225 In addition, p16 pre-tumoral signature was detected in juxta-tumoral samples, and was also more  
226 pronounced in early-stage (I) than late-stage tumors (III) (Fig. 3C). Finally, patients who displayed high  
227 expression scores of the p16 pre-tumoral signature exhibited longer progression-free survival, (adj. p-  
228 value= 0.03), as compared to patients with a low expression score of the p16 pre-tumoral signature  
229 (Fig. 3D, S3B-C).

230 Overall, using public data, we demonstrate that the p16 pre-tumoral signature of initial luminal  
231 transformation is detected in basal-like breast cancers and we show it is actually characteristic of early-  
232 stage basal-like tumors that rarely recur. These results suggest that in humans, as in mice, this p16-  
233 high transcriptional signature corresponds to an early stage in tumorigenesis.

234

235 We next investigated pre-tumoral gene signatures prior to tumor formation in humans in a *BRCA1*/*+*  
236 deficient context, to understand whether we could detect premises of the p16 pre-tumoral state. To  
237 do so, we interrogated gene signatures in the epithelium compartment of patients with germline  
238 *BRCA1* heterozygous deficiency (*BRCA1*/*+*/*-*) prior to tumor formation. We exploited the publicly  
239 available scRNAseq human dataset harboring normal-like and *BRCA1*/*+*/*-* pre-neoplastic mammary  
240 gland samples (GSE161529) (Pal et al. 2021). In this context, in contrast to established human tumors  
241 and the mouse model presented above, only one copy of *BRCA1* is deficient and *TP53* is initially  
242 functional.

243 We performed the same semi-manual annotation procedure as in the first part and focused solely on  
244 the mammary epithelial compartment from normal-like and *BRCA1*/*+*/*-* pre-neoplastic samples (Fig. 3E,  
245 Fig. S3D-E). We projected each epithelial subtype in an independent Principal Component Analysis  
246 (PCA) space, and showed that LPs are the cell type most affected by *BRCA1* deficiency (see Methods):  
247 the informative PCs with the highest explained variance were retrieved from the LP PCA projection

248 (Fig. 3F, FigS3F-G). LPs in *BRCA1*<sup>+/-</sup> patients display transcriptional defects, they aberrantly activate  
249 genes involved in mammary stem cell signatures and several genes defining a senescence associated  
250 secretory phenotype SASP, including chemokines, IL6 and MMP3 (Fig. 3G-H, Table S2). Such analysis  
251 confirms, as shown by others, that *BRCA1* deficiency can lead to senescence-like states (Sedic et al.  
252 2015). However, we could not detect, as in juxta-tumoral tissues or human basal-like tumors above,  
253 key components of the p16 pre-tumoral state, such as EMT actors or p16 activation. We postulate that  
254 such transcriptional changes occur with the onset of tumorigenesis, and probably following *TP53*  
255 inactivation (Martins et al. 2012).

256

### 257 **Spatial and temporal analysis of the p16 pre-tumoral state**

258 We next sought to validate and spatially resolve the acquisition of the p16 pre-tumoral state in the  
259 mammary gland *in situ*. We performed multiplex immunohistochemistry on paraffin-embedded  
260 formalin-fixed (FFPE) sections from mice at different stages of tumorigenesis, with either normal-like  
261 epithelium, lesions, or tumors (including both Cre- and Cre+ animals) (Fig. 4A). This technique aimed  
262 to simultaneously monitor, on each section and at the single cell resolution, for over 70,790 cells: i)  
263 cell identity (Krt8, Krt5), ii) cell cycle status (p16, Ki67), and iii) epithelial to mesenchymal plasticity  
264 (EMP) (E-cadherin, N-cadherin, Vim) in addition to hematoxylin staining (Fig 4A, Fig S4, see Methods).  
265 We first quantified the proportion of p16 positive (p16<sup>+</sup>) cells within the epithelial compartment across  
266 timepoints starting at 3 months. We detected p16<sup>+</sup> cells (>5% in average) within lesions and tumors  
267 (Fig. 4A-B), confirming our single-cell transcriptomic analyses (Fig. 1). Importantly, while we did not  
268 observe any p16<sup>+</sup> cells in the Cre- animals (Fig. S4C), they were found within normal-like Cre+ ducts as  
269 early as 3 months (upper panel Fig. 4A), as well as within juxta-tumoral tissues in tumor-bearing  
270 animals. At the earliest time point, prior to any lesion or tumor formation, the p16<sup>+</sup> cells are isolated  
271 single cells (Fig. 4A, S4B) and located in the inner part of the duct, within the luminal compartment.  
272 Such initial localization, in addition to the correlation of p16 and Krt8 staining (Fig. 4C) confirmed their  
273 luminal origin (89% of the total p16<sup>+</sup> cells).

274 We next wanted to assess the proliferative capacity of these p16+ cells using Ki67 staining. In both  
275 duct and lesional samples, more than 32% of p16+ cells are Ki67+, supporting their capacity to escape  
276 p16-mediated cell cycle arrest at very early time-points. The proliferative index of p16+ cells is  
277 significantly higher in duct and lesions, compared to p16+ cells in tumors (15% Ki67+) and control  
278 mammary epithelial cells (6% Ki67+), suggesting that p16+ cells at the onset of Brca1 tumorigenesis  
279 are particularly proliferative (Fig. 4D).

280 Finally, we interrogated the extent of EMP within the epithelial compartment using Ecad, Ncad and  
281 vimentin stainings (Fig. 4E-F). In control Cre- mice at 5 months, luminal cells mostly display expected  
282 E-cadherin junctions and no vimentin-based filaments (Fig. 4F left donut). In contrast, p16+ cells within  
283 the luminal compartment of Cre+ animals were significantly enriched for vimentin and displayed  
284 enrichment for N-cadherin - together (40%) or not with E-cadherin (48%) (Fig.4E 2nd donut). In  
285 addition, they frequently displayed both Krt8 and Krt5 staining. Dual enrichments for E-cadherin and  
286 N-cadherin were not observed in lesions but in rare cases in tumors, underlying the metastable nature  
287 of EMP. In tumors, p16+ cells were grouped into spans of neighboring cells with high N-cadherin and  
288 vimentin expression (Fig. 4A, bottom panel, Large Tumor), confirming our observations by scRNAseq  
289 that only a fraction of tumor cells remain p16+ and harbor strong expression of mesenchymal features  
290 (Fig. 1G-H).

291  
292 Complementary to our initial single cell transcriptomics analyses, multiplex imaging enabled the  
293 extensive search for p16 rare pre-tumoral states in whole tissue slides at various time points. It allowed  
294 to detect p16+ individual isolated cells within the inner part of the mammary duct with mesenchymal  
295 markers at early time points, before any lesion or tumor formation, suggesting EMP is an early event  
296 in basal-like tumorigenesis. Losing epithelial characteristics could be essential for the rupture of the  
297 duct structure and formation of the initial tumor bud.

298

299

300 **p16 pre-tumoral state occurs post genomic crisis**

301 Loss of BRCA1 impairs homologous repair (HR) mechanisms, and leads to a major genomic crisis, with  
302 the accumulation of multiple genomic alterations (Scully and Livingston 2000; Polak et al. 2017). In  
303 such a context, we thought it was critical to understand when such a genomic crisis was occurring, and  
304 how it related to the phenotypic switches we were observing. We used our scRNAseq epithelial dataset  
305 to quantify genomic rearrangements and to investigate clonal evolution across cells and time points.  
306 Copy Number Variation (CNV) were first inferred from the scRNAseq data using inferCNV (Patel et al.  
307 2014), taking the basal cells as reference, as the Cre is not expressed in these cells (Molyneux et al.  
308 2010). For each cell, we calculated the percentage of their genome displaying genetic alterations (Fig.  
309 5A-B, Fig. S5A). All tumor cells display similar percentages of rearranged genomes (Fig. 5B, median=  
310 35.4%), whatever their size, suggesting that the genomic crisis probably occurred prior to tumor  
311 expansion. LP cells of tumor-free & lesion-free animals already display a high percentage of CNVs  
312 (median 23 %) compared to the basal cells (median 5.3%), even at 2.7 months (median 22.4%). Such  
313 observations imply that the LP compartment can tolerate numerous CNVs following Brca1/Trp53  
314 deletion, without any rapid phenotypic consequence. Rates of genome rearrangement in p16 pre-  
315 tumoral cells are among the highest of the LP compartment (median % alteration = 25%), yet their  
316 maximum rate does not exceed what is observed in the LP population (Fig. 5B). Altogether, we show  
317 that the major outburst of CNVs occurs in the LP compartment prior to any tumor formation, in  
318 agreement with previous studies which showed that copy number alterations were acquired in short  
319 punctuated bursts at early stages of tumor formation (Gao et al. 2016). These results suggest that the  
320 genomic crisis triggered by Brca1/Trp53 deletion is not sufficient to launch tumorigenesis, and  
321 precedes the partial EMT processes identified above.

322

323 **p16 pre-tumoral state is multi-clonal**

324 To understand how p16 pre-tumoral cells emerged from the LP compartment - through clonal  
325 expansion or a few cells or state transitions in multiple LP cells - we next investigated clonal dynamics

326 within the LP compartment, p16 pre-tumoral population and the small tumor. We performed  
327 integrative consensus hierarchical clustering to identify genetic clones within each cell population (see  
328 Methods); and samples with no stable partition were considered as highly multi-clonal (Fig. S5B). In  
329 addition, we evaluated correlation scores between single-cell CNV profiles across clusters, to further  
330 confirm the absence or existence of sub-clones; considering that genetic clones will show high intra-  
331 correlations scores by definition.

332 As expected, we could not partition the population of reference basal cells into clones, further  
333 confirmed by a random distribution of cell-to-cell correlation scores (Fig. 5C). In the LP compartment,  
334 we could not identify any stable partition (Fig. 5D and Fig. S5B-C) into clones, further supported by low  
335 cell-to-cell correlation scores (Fig. 5C). In the p16 pre-tumoral cells, 47% of cells remained highly multi-  
336 clonal, with cell-to-cell correlation scores similar to those of the LP compartment, but we could also  
337 identify 3 clones accounting for 53% of cells (Fig. 5C-D, Fig. S5B,D). In contrast, the small tumor was  
338 organized into 3 major clones (Fig. 5C and Fig. S5E) accounting for 93% of the cells (Clones 1, 2 & 3),  
339 with high intra-clone correlations scores (median 0.56) (Fig. 5C-D). These results suggest that the  
340 transition from the LP to p16 pre-tumoral state can be achieved by a multitude of cells, and not only  
341 by isolated clones that are being selected for. This strongly suggests the contribution of non-genetic  
342 mechanisms to this transition state, potentially dedifferentiation or partial EMT mechanisms,  
343 identified above.

344

#### 345 **Disruption of heterochromatin at the onset of tumorigenesis**

346 To further characterize the p16 pre-tumoral state, we next investigated canonical markers of  
347 senescence associated to p16 upregulation (Collado and Serrano 2010): presence of B-galactosidase  
348 (Bgal) and senescence-associated heterochromatin foci (SAHF) within tissues. We could not quantify  
349 any Bgal within juxta-tumoral or tumor sections (Fig. S6A), however we identified SAHF-like structure  
350 in lesions by immunofluorescence (Fig. 6A). Regarding SAHF, they were initially defined as main cores  
351 enriched in H3K9me3 mark, coated by enriched rings in H3K27me3 (Aird and Zhang 2013; Paluvai, Di

352 Giorgio, and Brancolini 2020). As H3K9me3 mark is already organized in foci in non-senesence cells in  
353 mice -chromocenters (Probst and Almouzni 2008), we chose H3K27me3 staining to study changes in  
354 heterochromatin organization during Brca1 tumorigenesis.

355 As expected, in mammary gland controls from Cre- mice, H3K27me3 staining revealed one single foci  
356 per cell (Fig.6A-B), corresponding to the inactive X (Xi), whereas the remaining staining is  
357 homogeneously diffused in the nucleus (Fig. 6A, Fig. S6B top panel). In lesions and tumors, we observed  
358 the accumulation of multiple H3K27me3-enriched chromatin forming small aggregates, that we  
359 termed micro-heterochromatin-foci ( $\mu$ -HF) (Fig. 6A, Fig. S6B). In addition, H3K27me3-enriched  
360 chromatin tended to accumulate in ring-like structures, surrounding nuclear regions devoid of DNA as  
361 attested by negative DAPI staining- possibly corresponding to nucleoli (Cmarko et al. 2008).

362 We further investigated the special case of the heterochromatin of the Xi, as the loss of the Barr Body  
363 is a hallmark of basal-like breast cancers, whether through a genetic loss of the inactive X chromosome  
364 (Ganesan et al. 2004; Vincent-Salomon et al. 2007) or following epigenomic reprogramming and  
365 reactivation of the inactive X (Chaligné et al. 2015). Using both H3K4me3 and H3K27me3 tumor derived  
366 datasets, we actually show that H3K27me3 signal from the X-chromosome is lost in tumor cells,  
367 indicating that the Xi is either genetically lost or it has lost its repressive chromatin enrichment, in both  
368 cases attesting disruption of this heterochromatin structure (Fig. S6D). The absence of H3K4me3  
369 enrichment anywhere on the X chromosome in these same cells, demonstrates the absence of partial  
370 or total reactivation of the Xi, and favors the genetic loss of the Barr Body in the cells (Fig. S6D-E).

371 We hypothesized (Fig. 6C) that the accumulation of  $\mu$ -HF could either be the result of (i) the nuclear  
372 reorganization of regions of heterochromatin, leading to co-localization of multiple heterochromatic  
373 regions, or (ii) the expansion of H3K27me3 enrichment on large genomic regions - similar to Xi-  
374 enrichment. We used H3K27me3 genome-wide maps to test both hypotheses as only the latter would  
375 lead to genomic redistribution of H3K27me3 marks. We generated H3K27me3 ChIPseq datasets for  
376 n=5 tumors and compared them to published datasets for normal mammary cells (Pal et al. 2013).  
377 When comparing H3K27me3 peak breadth genome-wide, tumors did not show largest H3K27me3

378 peaks on autosomes (Fig. 6D). These results demonstrate the absence of large heterochromatinization  
379 phenomena on autosomes (>Mb), and suggest that formation of  $\mu$ -HF rather corresponds to spatial  
380 reorganization of existing chromatin regions.

381 We next investigated whether this major nuclear reorganization was associated with focal H3K27me3  
382 changes during tumorigenesis, undetectable at the microscopic scale but at the genomic scale. We  
383 included in our analysis H3K27me3 profiles of published FACS-sorted mammary gland luminal and  
384 basal cell populations, along with our tumor samples to seek for recurrent epigenomic differences  
385 between normal and malignant samples. Principal component analysis (PCA) showed that tumors have  
386 heterogeneous repressive epigenomes, yet 34% of variance is driven by common tumor-specific  
387 epigenomic features (PC1) (Fig. S6C). When comparing tumors versus cells of the physiological gland,  
388 we show that several cell cycle genes (*Cdkn2a*, *Cdk12*, *Cdk6*) display a recurrent loss of repressive  
389 H3K27me3 enrichment in tumors (Fig. 6E), both inhibitors and promoters, suggesting that local  
390 epigenomic remodeling could participate both in the entry and exit of cell cycle during tumorigenesis.  
391 Loss of H3K27me3 had already been shown to enable *Cdkn2a* transcriptional activation in early  
392 senescence (Ito et al. 2018).

393 Altogether we show that disruption of heterochromatin - with a drastic spatial reorganization in the  
394 nuclei and rare local rearrangements - occurs early in tumorigenesis, potentially as a consequence of  
395 a senescent-like state.

396

397

398

399

400

401

402



## 403 DISCUSSION

404 Our study provides a detailed mapping of the transcriptional, genetic and epigenetic evolution of  
405 epithelial cells during early stages of basal-like breast tumorigenesis *in vivo*. Thanks to a mouse model  
406 launching tumorigenesis in multiple luminal progenitor cells, we have been able to detect rare state  
407 transitions occurring in epithelial cells prior to tumor formation - that cannot be studied in humans.  
408 Our *in vivo* results partially bridge the gap between observations from pre-tumoral tissues and  
409 established basal-like tumors in humans (Figure 7). We show the occurrence of epithelial to  
410 mesenchymal plasticity (EMP) in the luminal compartment of mammary glands at the onset of  
411 tumorigenesis. Our data demonstrate that luminal progenitor cells can switch to a p16+ cycling state,  
412 with an activation of partial EMT and angiogenesis-related pathways while shutting down apoptosis  
413 and estrogen-related signaling. We propose that these cells have previously undergone a transient cell  
414 cycle arrest, supported by two features of the senescent state: (i) *Cdkn2a*/p16 demethylation and  
415 subsequent expression and (ii) the drastic reorganization of heterochromatin with the formation of  
416 multiple heterochromatin foci. It has previously been shown that loss of *Brca1* is followed by  
417 senescence-like processes, whether in mammary epithelial cells or even in embryos (Cao et al. 2003;  
418 Sedic et al. 2015). It is often triggered by telomericism or after activation of oncogenes expression and  
419 mediated by Trp53. Senescence has also been frequently shown to occur in breast cancer cells  
420 following irreversible damage or cancer treatments, preventing the cells from proliferating and  
421 thereby stopping the tumor growth (Ewald et al. 2010; Fitsiou, Soto-Gamez, and Demaria 2021). Yet  
422 little was known about how and whether these tumor cells escaped such senescence-like phenomena.  
423 EMP occurs both in normal and pathological contexts, e.g embryonic development, wound healing,  
424 fibrosis, or cancer metastasis, where it enables cells to adopt a migratory and invasive behavior (Nieto  
425 et al. 2016). In the mammary gland, it is involved both in organogenesis and cancer metastasis  
426 (Chakrabarti et al. 2012). During tumor progression, EMT is known to participate in cancer  
427 dissemination, as it enables cells of the primary tumor to leave the tissue of origin through partial  
428 dissociation of the primary carcinoma. Our results are one of the first examples *in vivo* of the

429 occurrence of partial EMT at the onset of tumorigenesis. The transition from an epithelial to  
430 mesenchymal state is often incomplete and metastable (Pastushenko et al. 2018), with cells in  
431 intermediate states combining epithelial and mesenchymal features as we do observe here. Combining  
432 single-cell transcriptomics and multiplex imaging in tissues, we have identified several characteristics  
433 of EMP (Yang et al. 2020) in luminal progenitor cells as they leave the luminal compartment to form  
434 lesions: (i) remodeling of the cytoskeleton, with a decrease in cytokeratins (Krt8, Krt19 and Krt18) and  
435 a switch to vimentin-based filaments, (ii) reduced cell-cell adhesive properties with the decrease in E-  
436 cadherin expression and apparition of N-cadherin, (iii) the expression of the transcription factor  
437 Twist1, and (iv) modifications of the extracellular matrix with the expression of Fibronectin. For the  
438 latter, we have also observed a specific expression of type XI Collagen from pre-tumoral cells (*Col11a1*,  
439 *Col2a1* a.k.a *Col11a3*). Type XI collagen is characteristic of deregulated matrisome of the most  
440 aggressive tumors across cancer types (Nallanthighal, Heiserman, and Cheon 2021; S. B. Lim et al.  
441 2017; Pearce et al. 2018) - whether expressed by tumor or stromal cells, high *COL11A1* is associated  
442 with cancer invasiveness and metastasis.

443 What exactly launches EMP in early tumorigenesis remains to be determined. Here, we show that the  
444 transcription factor Twist1 is transcribed in the pre-tumoral population; it could orchestrate part of  
445 the EMP phenotype that we observe. We have indeed found in pre-tumoral cells signs of Twist1 activity  
446 with the activation of its target genes, Fibronectin, N-Cadherin and Sparc, and repression of its known  
447 epithelial target genes E-cadherin and Claudin genes (*Cldn4*, 3 and 1) (Lamouille, Xu, and Derynck  
448 2014). Yet it remains to be determined what exactly triggers its activation. *BRCA1* itself has recently  
449 been identified as a guardian of the epithelial states (Zhang et al. 2022) - inactivation of *BRCA1* by  
450 CRISPR leads to increased EMP in mammary cells. Another trigger of EMT could also be senescence -  
451 itself induced by extensive genomic rearrangements following Trp53 and Brca1 deletion. It has been  
452 proposed *in vitro* that EMT, driven by Twist1 and 2, could help override Ras-induced senescence in  
453 mouse fibroblasts (Ansieau et al. 2008). Recently, it was shown that senescence actually bridges RAS  
454 activation and EMT over the course of malignant transformation in human mammary epithelial cells

455 (De Blander et al. under consideration). In a therapy-induced senescence phenotype, it was also shown  
456 that senescence promotes reprogramming and cancer stemness (Milanovic et al. 2018), suggesting  
457 that non-genetic mechanisms could be tightly associated to the entry and exit of the senescent state  
458 in various contexts. Here, based on our *in vivo* results, we propose that during early basal-like breast  
459 tumorigenesis, luminal progenitor cells undergo a cell-cycle arrest characterized by p16 activation, and  
460 that subsequently cells bypass this arrest through non-genetic mechanisms, potentially with partial  
461 EMT, as demonstrated by the existence of a p16+ cycling population harboring both epithelial and  
462 mesenchymal markers.

463 In the earliest step of tumorigenesis, we have also observed the occurrence of a major  
464 heterochromatin crisis, with the total reorganization of H3K27me3-enriched chromatin in the nucleus  
465 *in vivo*: a loss of the inactive X (Xi) together with the accumulation of H3K27 foci. The foci resemble  
466 senescence-associated heterochromatin foci (SAHF), hallmarks cellular senescence (Stone, McCabe,  
467 and Ashworth 2003; Kristiansen et al. 2005; Sirchia et al. 2005). The destabilization and loss of the Xi  
468 could be a consequence of a global 3D reorganization of H3K27me3-enriched heterochromatin in the  
469 nucleus. Recruitment of heterochromatin to nucleoli structures - as observed in pre-tumoral and  
470 tumoral cells - could for example lead to the destabilization of the Xi (Bizhanova and Kaufman 2021).  
471 Such observations - together with the demethylation and subsequent activation of p16 - suggest that  
472 these pre-tumoral cells might have entered at some point a senescence-like state. Such epigenomic  
473 abnormalities are recurrently observed in full grown basal-like tumors, notably the loss of the Xi  
474 through genetic or epigenetic events (Ganesan et al. 2004; Chaligné et al. 2015; Vincent-Salomon et  
475 al. 2007). We propose that heterochromatin abnormalities, together with p16 upregulation, in human  
476 tumors might be scars of such initial heterochromatin crisis and associated senescence-like state.

477 Finally, our work opens up several translational perspectives for the early interception of *BRCA1*  
478 tumorigenesis and potential patient stratification. Detecting single tumor-initiating events in humans  
479 is close to impossible, and we have used a mouse model as a magnifying glass to detail early state  
480 transitions in *Brca1/Trp53* deficient epithelium. As mentioned in the introduction, in *BRCA1*-germline

481 carriers, *TP53* mutation was actually shown to be among the earliest events in tumor formation  
482 (Martins et al. 2012). Using our mouse datasets, we were able to define a p16 pre-tumoral signature,  
483 characteristic of the epithelial changes occurring at the onset of basal-like tumorigenesis and kept on  
484 during tumor formation. In human tumors, we show that this signature is specific to basal-like cancers,  
485 just like p16 overexpression. In addition, we show that it has prognostic potential: with basal-like  
486 tumors, patients with high pre-tumoral signature score have a significantly longer disease-free survival.  
487 Our results suggest that basal-like tumors with a high pre-tumoral signature score might have been at  
488 an earlier stage, hence with a better outcome. Our pre-tumoral gene signatures could constitute  
489 candidate biomarkers to detect early epithelial transformation and be favorable prognostic markers.  
490 Among the earliest events to detect, we show the advent of dual expression of basal and luminal  
491 markers - supported by multiplex imaging data of isolated p16+ cells detaching from the luminal  
492 compartment. A recent study actually shows that alveolar cells with dual basal/luminal markers, and  
493 a gene-signature associated with basal-like cancers, accumulate with age in human breast (Gray et al.  
494 2022), further highlighting the potential interest of cells with poor lineage definition.  
495 In terms of therapeutic targets, preventing the early state transitions occurring in the luminal  
496 progenitor compartment switch from luminal to a pre-tumoral p16+ cycling state for example, could  
497 be a relevant therapeutic avenue that we need to investigate. One strategy would be to target EMP,  
498 by hampering the listed characteristics above to destabilize this plastic state, with for example  
499 COL11A1 inhibitors (Nallanthighal, Heiserman, and Cheon 2021), or by launching Twist1 degradation  
500 with harmine (Yochum et al. 2017). Another Achilles heel of the pre-tumoral state could be the  
501 mechanisms used to re-entry cell cycle post cell cycle arrest upon p16 activation. We have shown that  
502 pre-tumoral cells over-express both Cdk4 and Ccnd1, that together promote the switch from G1 to S  
503 phase, and are antagonized by p16. Such combined over-expression might be a mechanism for these  
504 cells to escape p16 overexpression. In this line, p16+ cycling pre-tumoral cells might be particularly  
505 sensitive to CDK4/6 inhibitors.  
506

507

508

509

510

511

512

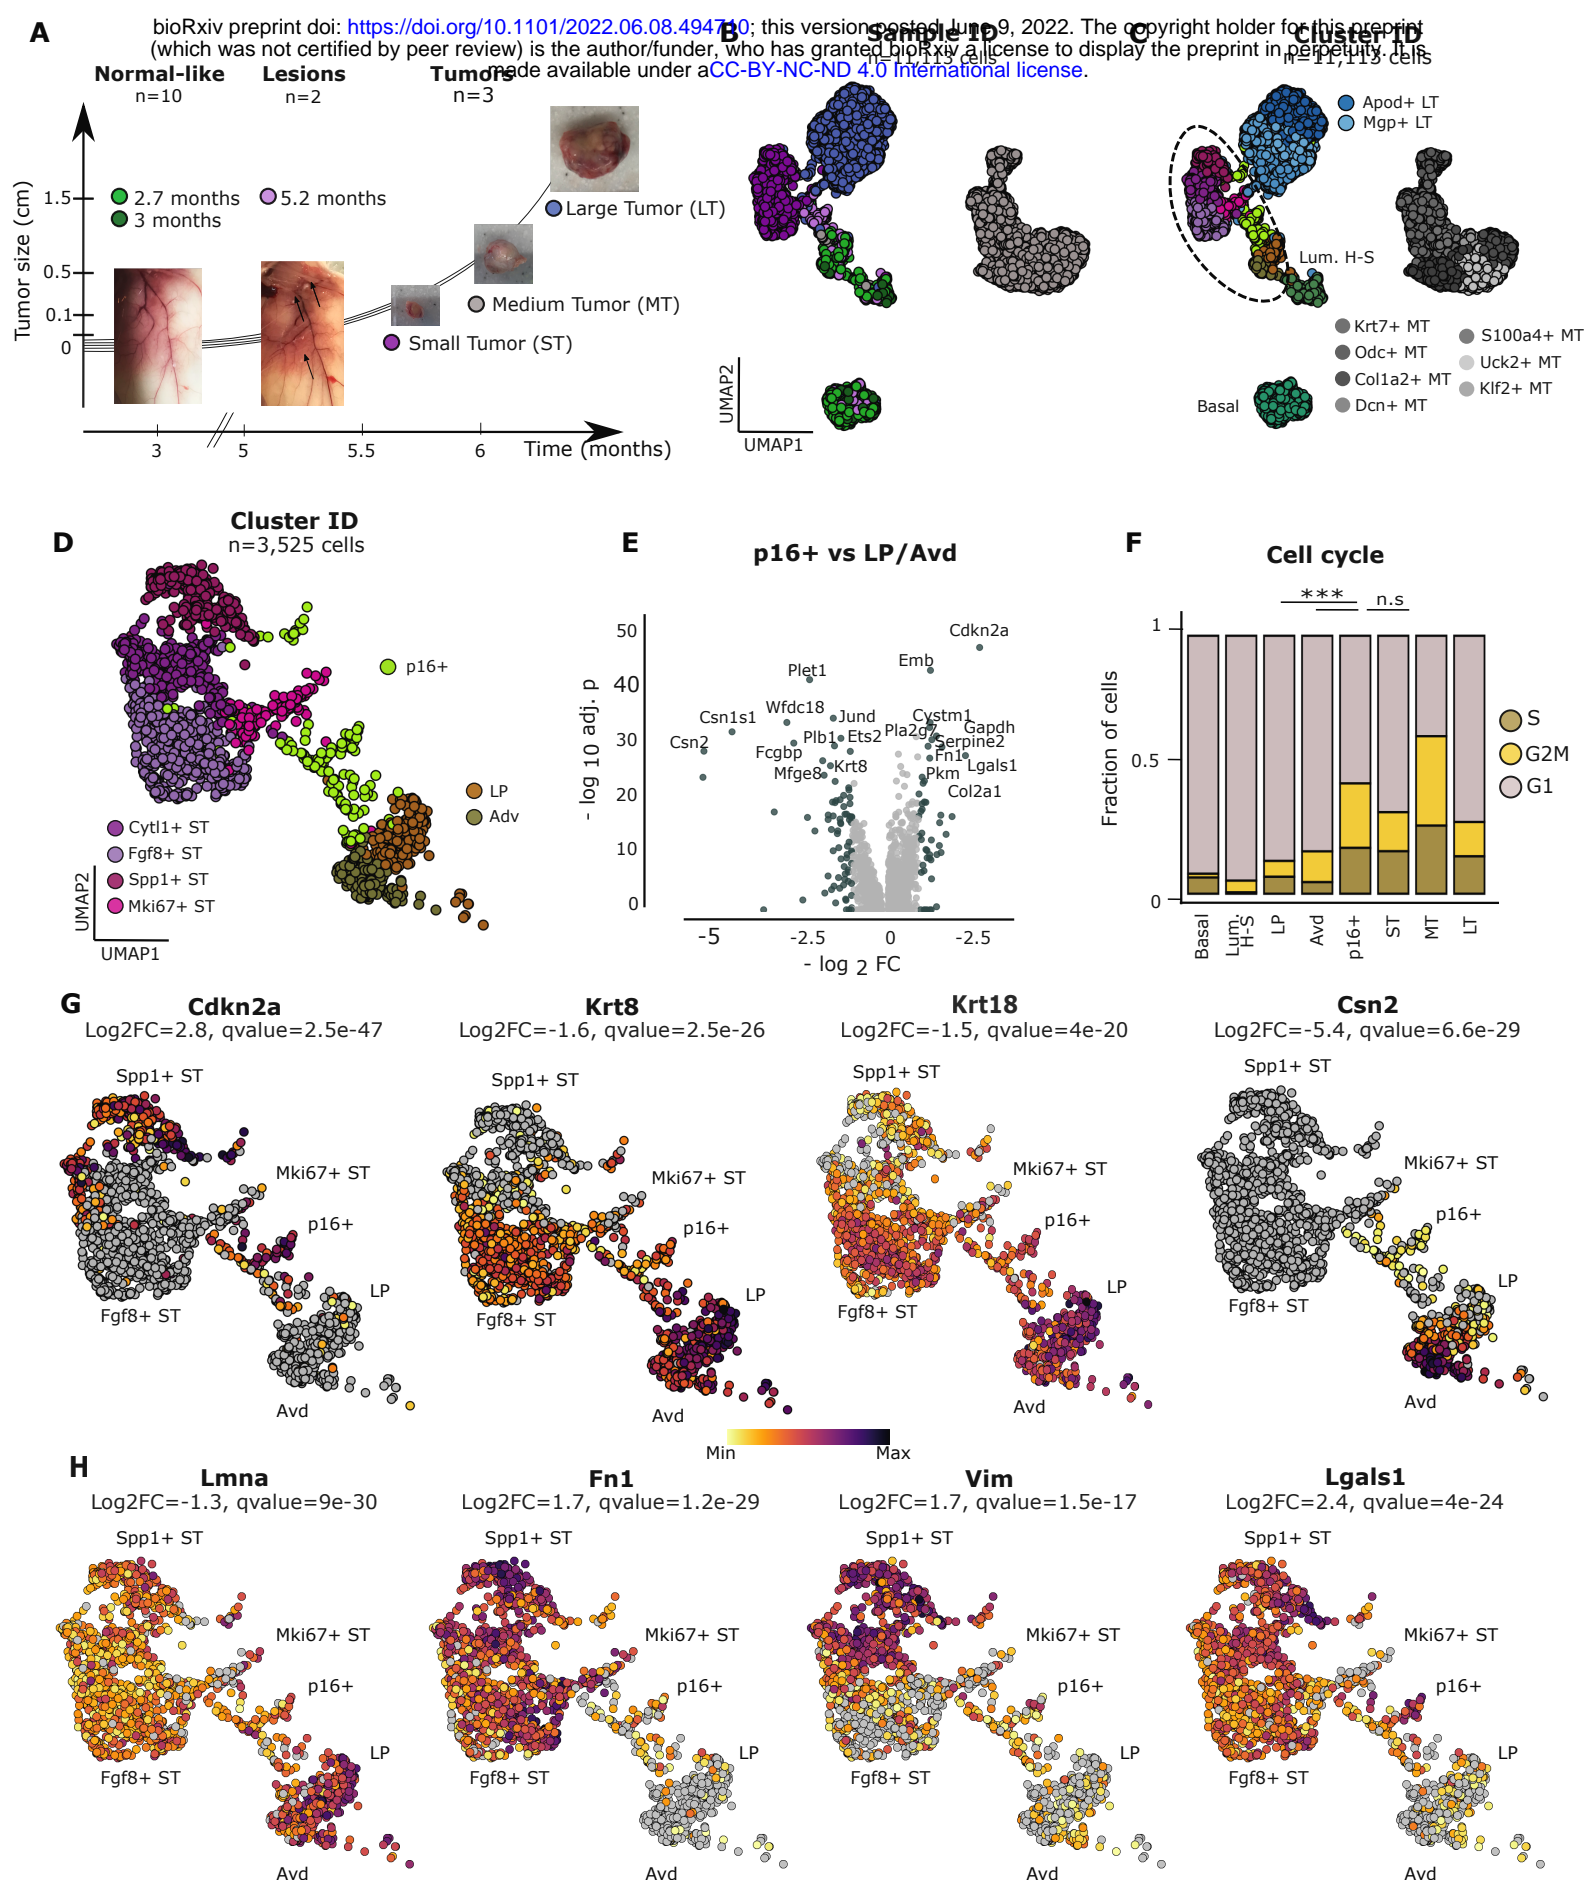

**Figure 1: Identification of p16-high cycling cells within lesions of the mammary gland.** (A) Schematic representation of the timeframe and histological classification of the in vivo processed samples using scRNAseq 10X technology. (B) UMAP representation of the epithelial cells; each dot represents a cell, and is colored according to the sample of origin. (C) UMAP, colored according to cluster-based annotation. (D) Zoom in on the corresponding UMAP embeddings to the transitional cell clusters (see material and methods). Cells were colored according to cluster-based annotation. (E) Volcano plot representation of the DEGs in p16+ cycling cells compared to LP and Adv, highlighted are top DEGs, with an absolute  $\log_2 FC > 1.2$  and a significant adjusted p-value ( $< 0.05$ ). X-axis represents the  $\log_2 FC$  and the y-axis represents the  $-\log_{10}(\text{adjusted p-value})$ . (F) Barplot representation of the fraction of cell cycle phases (G1, S or G2/M) inferred for each Major-type annotation; including: Basal, Luminal Hormone-Sensing (H-S), Luminal Progenitors (LP), Alveolar-differentiated (Adv), P16+lesional cells, and grouped cells per tumor size: Small Tumor (ST), Medium tumor (MT) and late tumor (LT). asterisks above LP indicate significance of p16+ versus LP; asterisks above ST indicate significance of p16+ versus ST. \* $P < 0.05$ , \*\* $P < 0.01$ , \*\*\* $P < 0.001$ , n.s.:not significant. (G) UMAPs displaying the expression levels of top down-regulated (Krt8, Krt8 and Csn2, Lmna) and up-regulated (Cdkn2a, Fn1, Lgals1 and Vim) genes in p16+ cycling cells compared to LP and Adv.  $\log_{10}$  expression levels are color-coded.

**A**

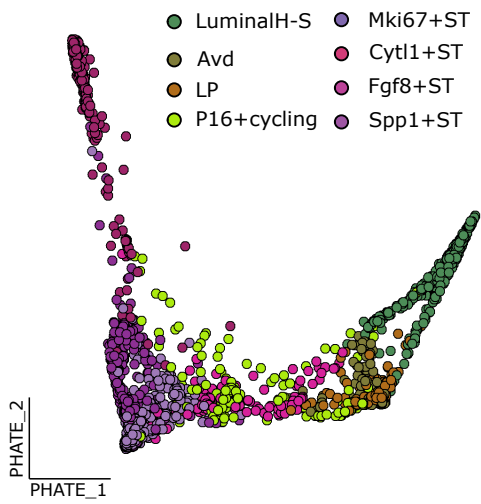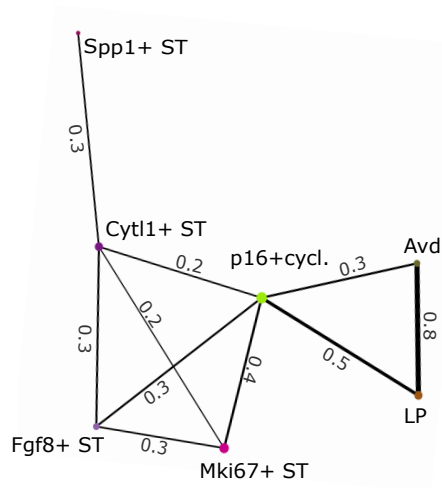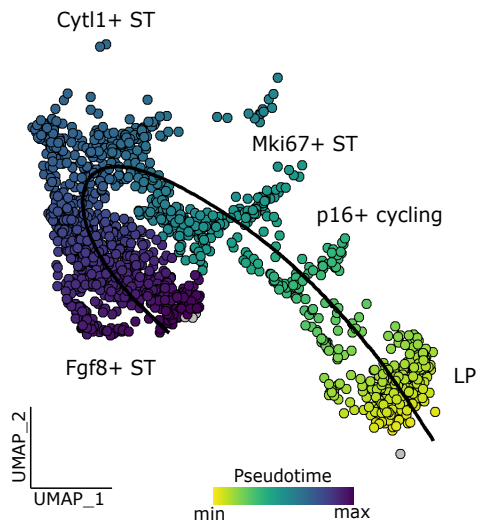

**D**

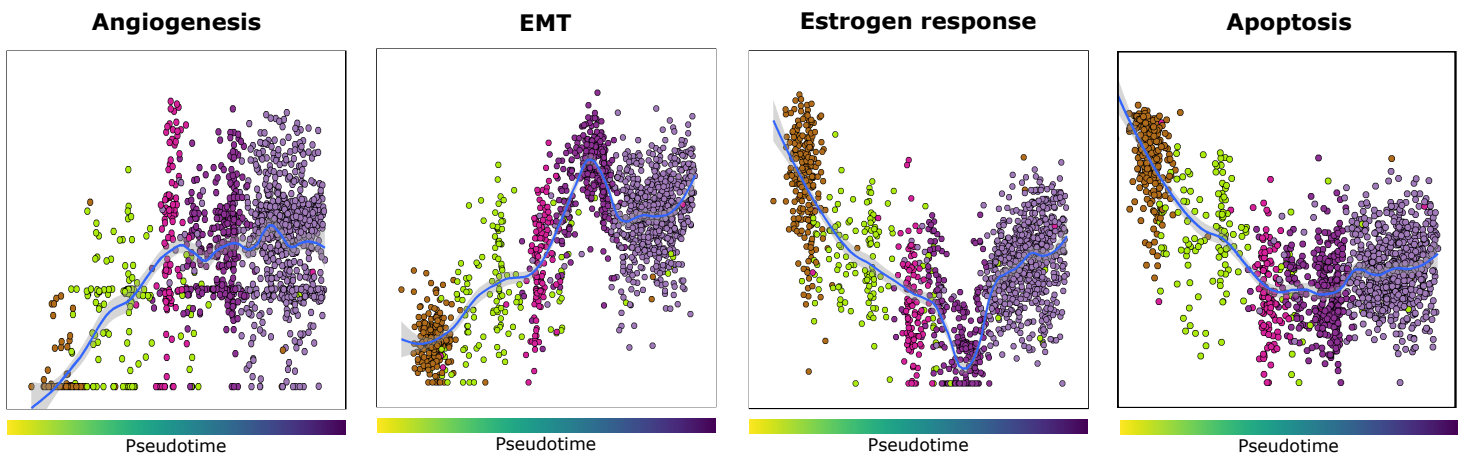

**E**

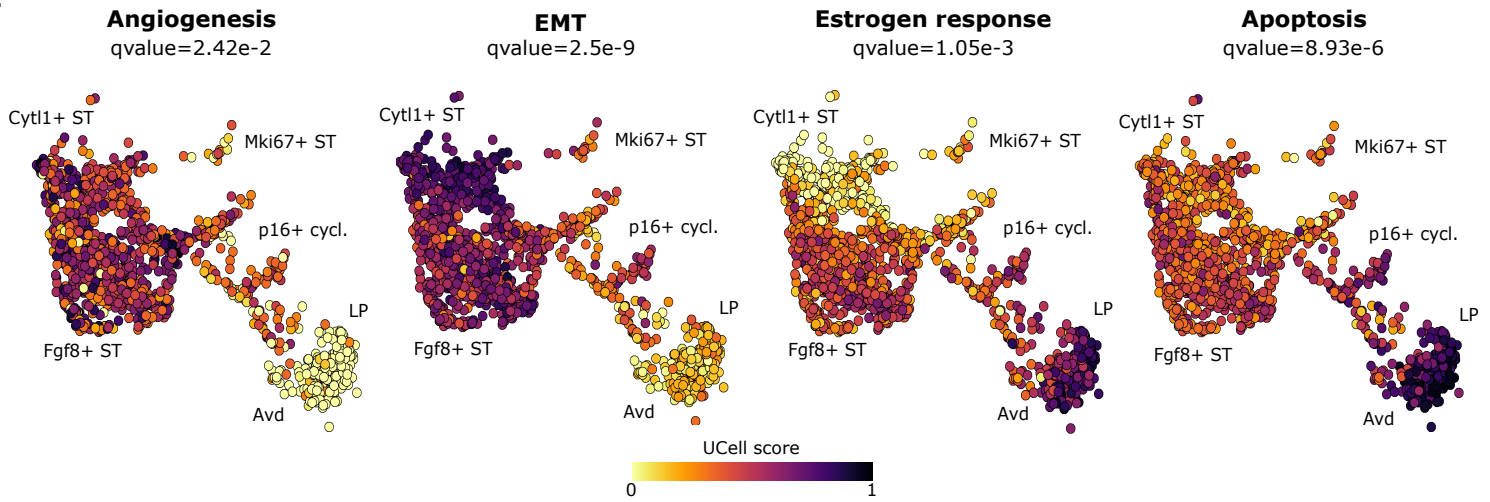

**Figure 2: p16-high cycling state is a transitory state between LP and tumor cells.** (A) Potential of Heat-diffusion for Affinity-based Trajectory Embedding (PHATE) dimension reduction applied on the zoomed epithelial cells displayed in Fig1C. (B) Partition-based graph abstraction (PAGA) graphical representation of the transitioning clusters, previously represented on UMAP embeddings (Fig1E); nodes are the cell groups and the edge thickness quantifies the connectivity scores between the graph-partitions, highlighted on the graph. (C) UMAP representation with cells colored according to inferred pseudotime values, using the Slingshot algorithm. Transition path is shown by the passing-by line on the cells of interest. (D) Scatter plot representation of transcriptional signatures, based on the gene sets correlated to pseudotime; cells are ranked by increasing pseudotime values and colored according to their cluster ID. Scores for transcriptional signatures were calculated using UCell (see Material & Methods). (E) UMAP representation with cells colored according to UCell scores.

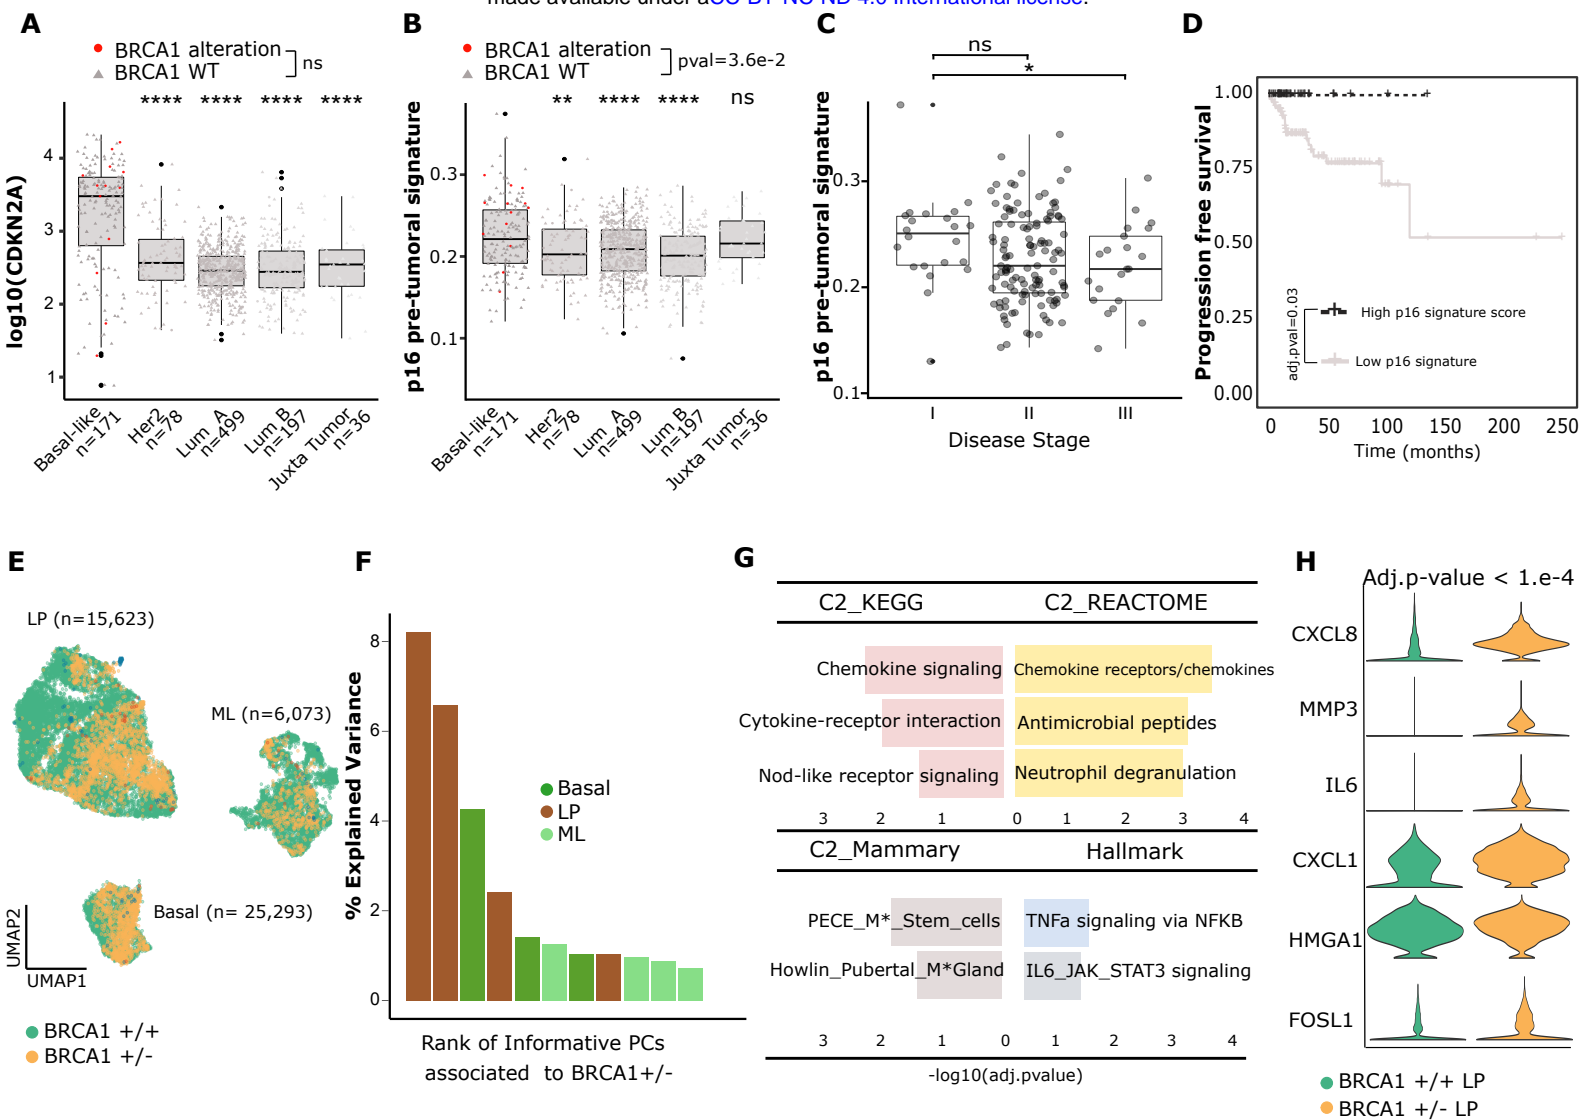

**Figure 3: Pre-tumoral signatures in human breast cancers.** (A) Boxplot distribution of log<sub>10</sub> normalized expression levels of CDKN2A for Breast Pan Cancer TCGA Cohort according to tumor type. (B) Boxplot representation of scores for the p16 pre-tumoral signature according to tumor type. (C) Boxplot representation of scores for the p16 pre-tumoral signature according to tumor stage. (D) Kaplan-Meier disease free survival curve for basal-like tumors, according to score of expression of the p16 pre-tumoral signature. (E) UMAP representation of the epithelial compartment from healthy (N=6) and BRCA1 +/- pre-neoplastic (N=2) human samples, including luminal progenitors (LP), mature luminal (ML) and basal cells; cells were colored according to the sample type of origin. (F) Barplot representation of the top most informative principal components (PC) separating pre-neoplastic from normal-like epithelial cell types. PCs were ranked according to explained variance in each epithelial compartment. (G) Barplot representation of activated pathways (using Hallmark and C2 MsigDB terms) in BRCA1 +/- versus BRCA1 +/- luminal progenitor compartment, y-axis represent -log<sub>10</sub> adjusted p-values. (H) Violin plot representation of expression levels of genes discriminating BRCA1 +/- from BRCA1 +/- LP cells.



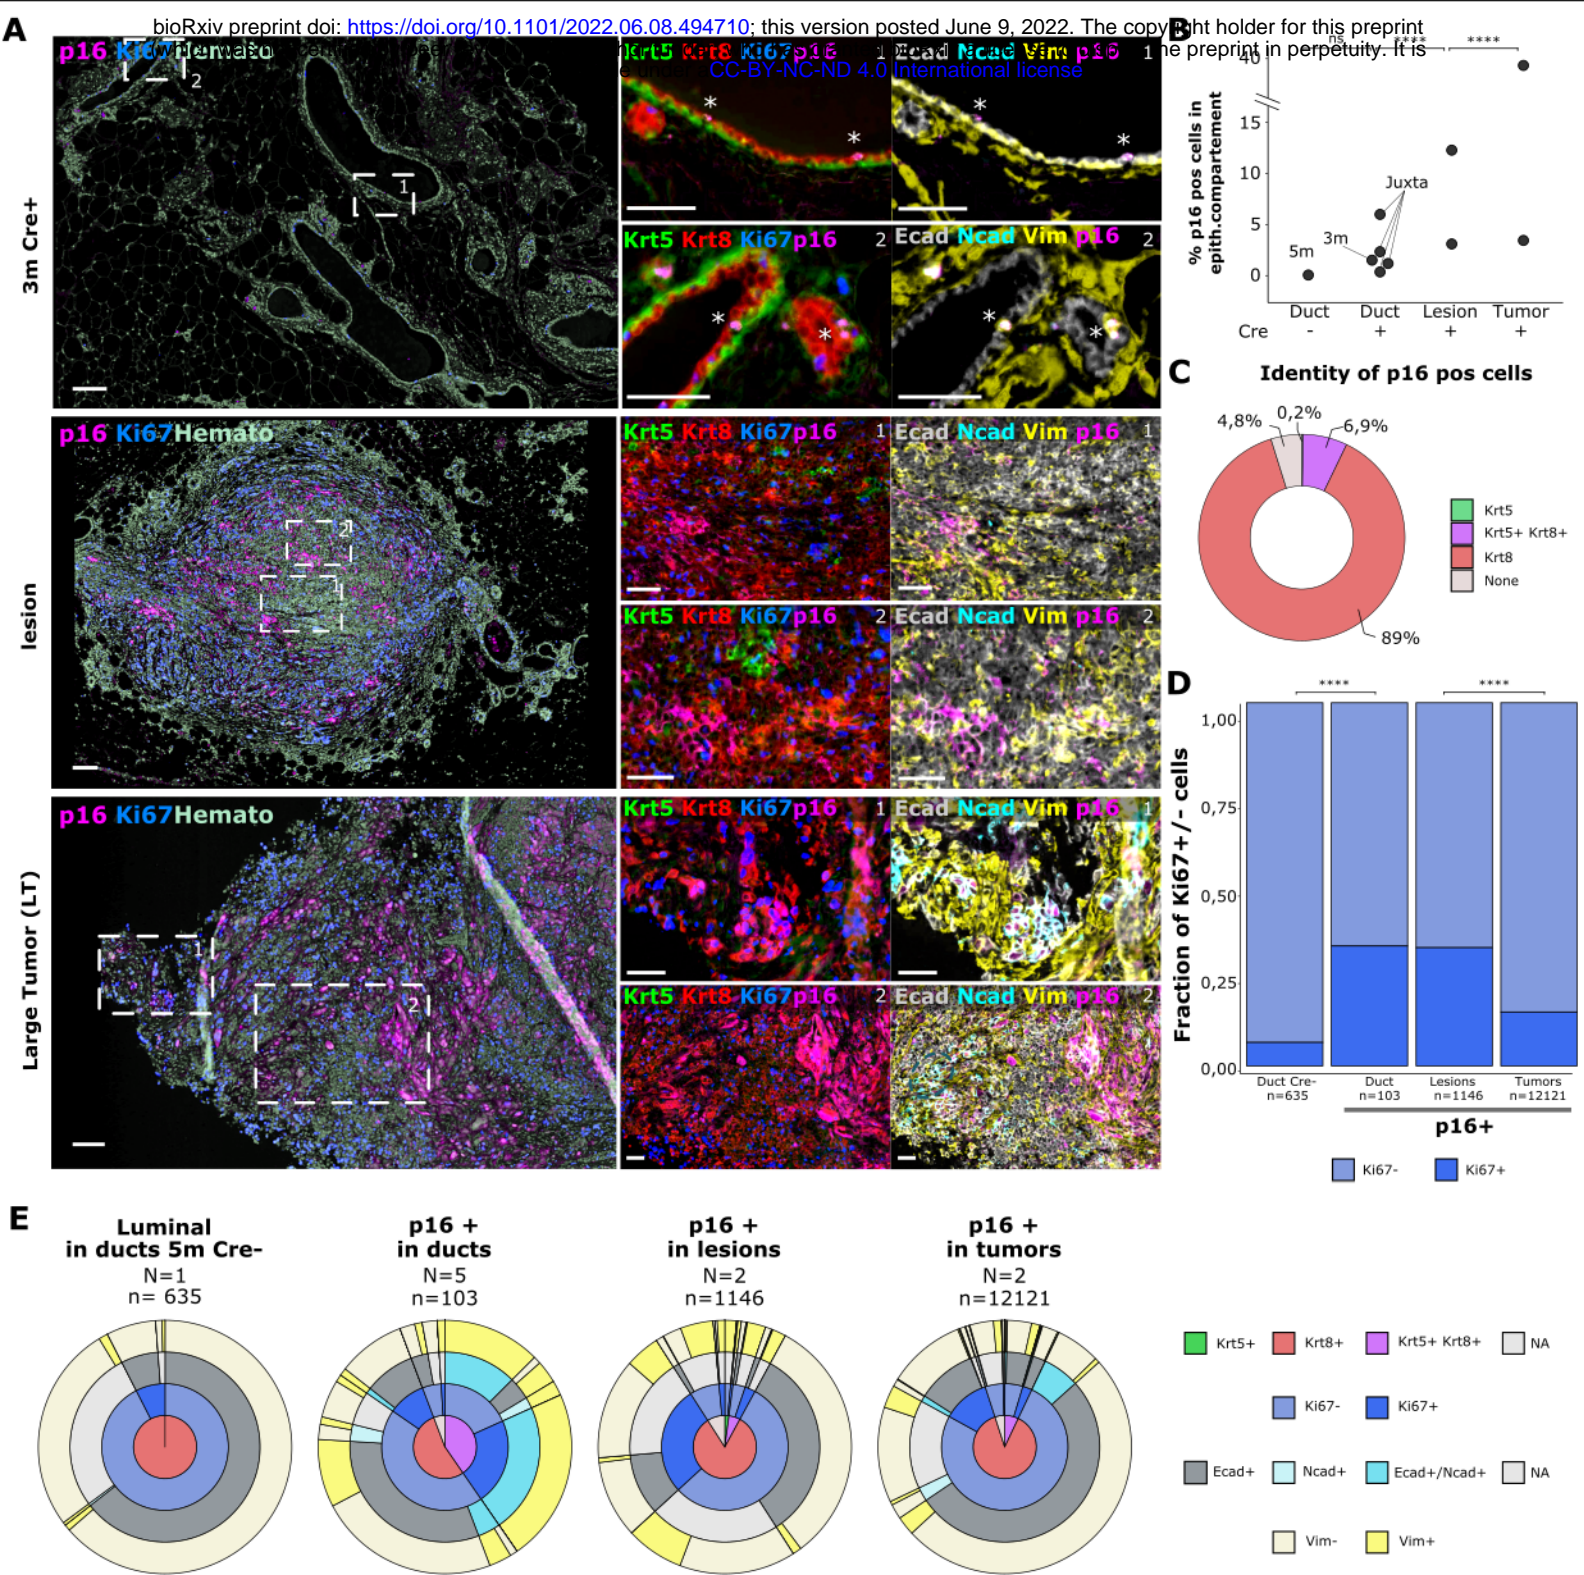

**Figure 4: Spatial characterisation of p16 activation and partial EMT.** (A) Left: Representative IHC staining for p16 (pink), Ki67 (blue) in young normal-like mammary epithelium from Cre+ 3-month-old mouse, in gland with lesion and in tumor, scale bar represents 100 $\mu$ m. For zooms, sections are stained for identity markers Krt5 (green), Krt8 (red), cell cycle markers Ki67 (blue), p16 (magenta) and EMT markers Ecad (white), Ncad (cyan), Vim (yellow), scale bar represents 50 $\mu$ m. (B) Dot plot representation of the percentage of p16+ positive cells at different stages of mammary tumorigenesis, including a negative control "duct 5m Cre-" and normal-like ducts from lesion-free or juxta-tumoral regions (N=5 Cre+ in total), N=2 samples with lesions, and N=2 tumor samples. Asterisks above each sample category represent the significance levels of pairwise comparisons between the 4 categories (Cre+ vs Cre-, lesional vs duct Cre+ and tumor vs lesional samples, respectively) with Fisher's test, \* $p < 0.05$ , \*\* $p < 0.01$ , \*\*\* $p < 0.001$ , \*\*\*\* $p < 0.0001$ . (C) Donut plot representation of the epithelial subtype origins of the p16+ cells, epithelial classes were color-coded. (D) Barplot displaying the fraction of Ki67+/- cells within p16+ cells fractions, and within a control population of luminal cells from 5m Cre- mouse. (E) Sunburst plot representation of the hierarchical distribution of control luminal cells from 5m Cre- mouse and p16+ cells, according to their mammary ID, cell-cycle status, and expression of EMT markers.

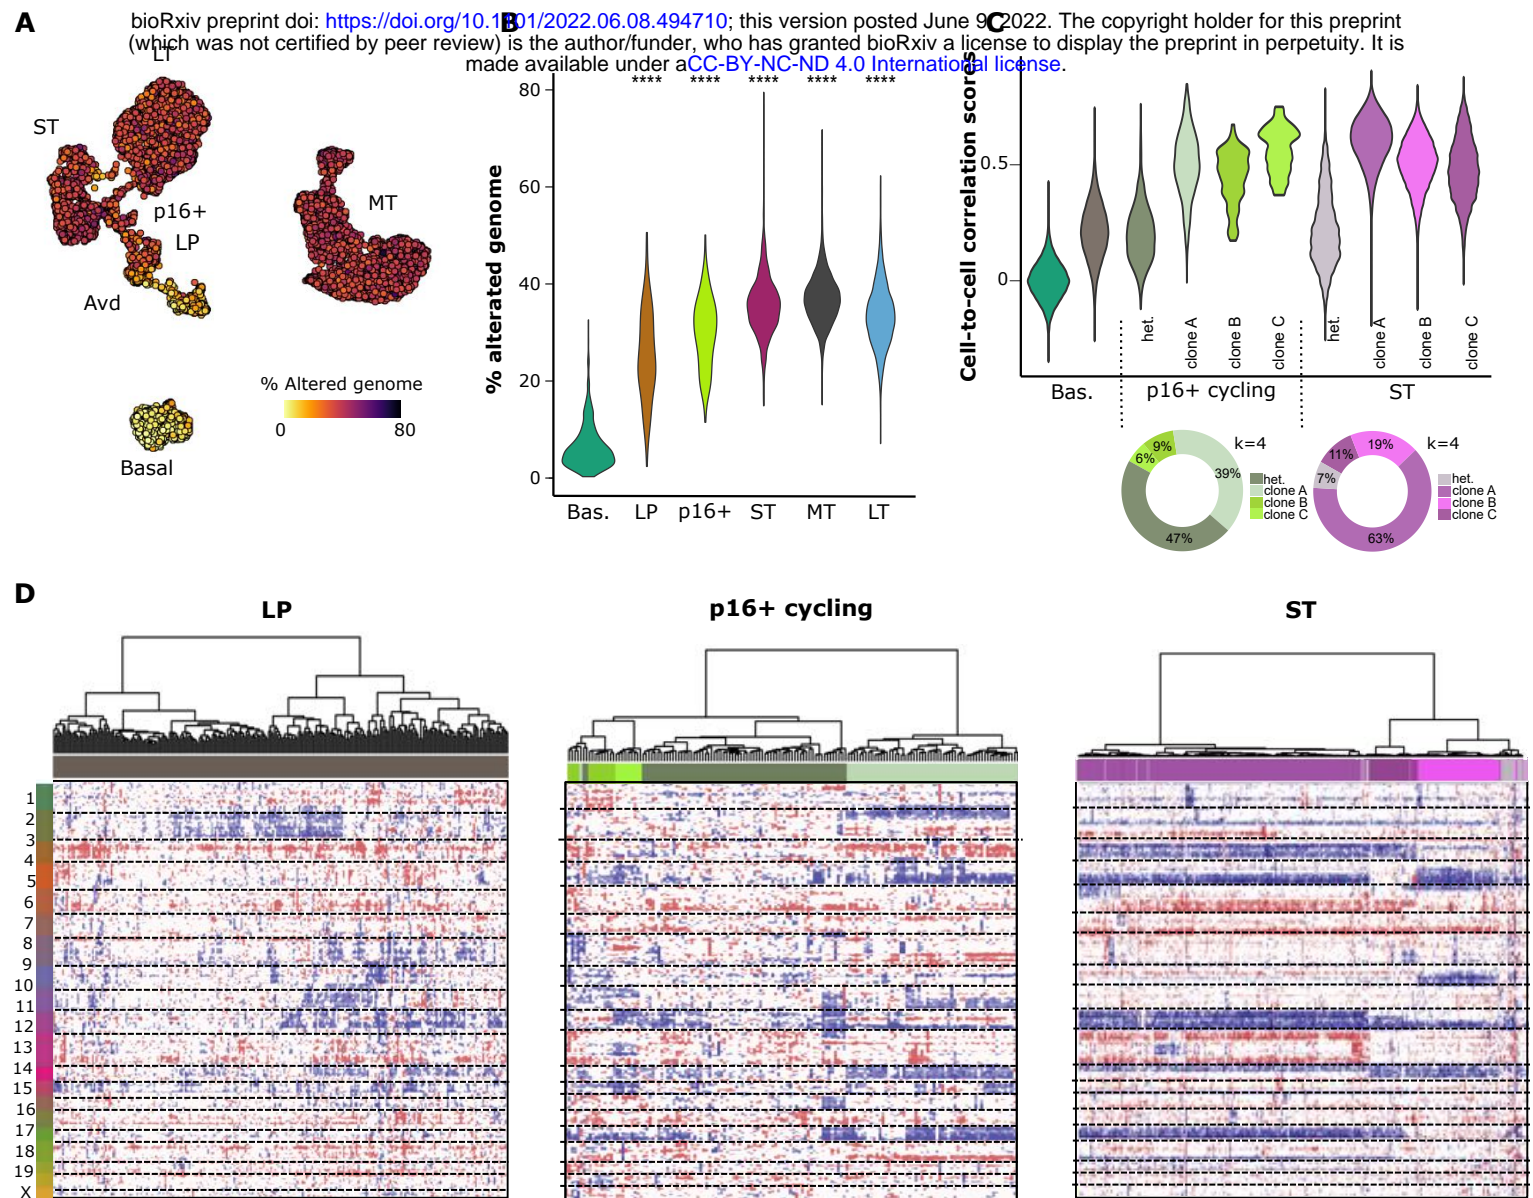

**Figure 5: Clonal evolution from LP, to p16-high cycling populations and tumors.** (A) UMAP representation of the transcriptomes of cells from the epithelial compartment with cells colored according to the percentage of their genome with CNV. (B) Violin plot distribution of the percentage of altered genome per cell, grouped by cluster ID; horizontal lines represent the median values. Asterisks represent the significance levels of mean comparison with basal cells. \* $P < 0.05$ , \*\* $P < 0.01$ , \*\*\* $P < 0.001$ . (C) Upper panel: violin plot distribution of the pairwise intra-cluster correlation scores between single-cell CNV profiles. Cluster partition (i.e. clone separation) was achieved with Consensus Clustering (Fig. S3). For LP and Basal clusters, intra-cluster correlation scores were computed on all cells of each compartment due to the absence of any consensual optimal number of clusters; Lower panel: Donut plot representation of the number of cells per clone for p16+ cycling cells and ST cells. (D) Heatmap representation of log-transformed residuals from inferCNV, with basal cells as a reference, for LP, p16+ cycling cells and cells from ST sample; blue and red values refer to deletions and gains respectively. Horizontal dotted lines separate chromosomes.

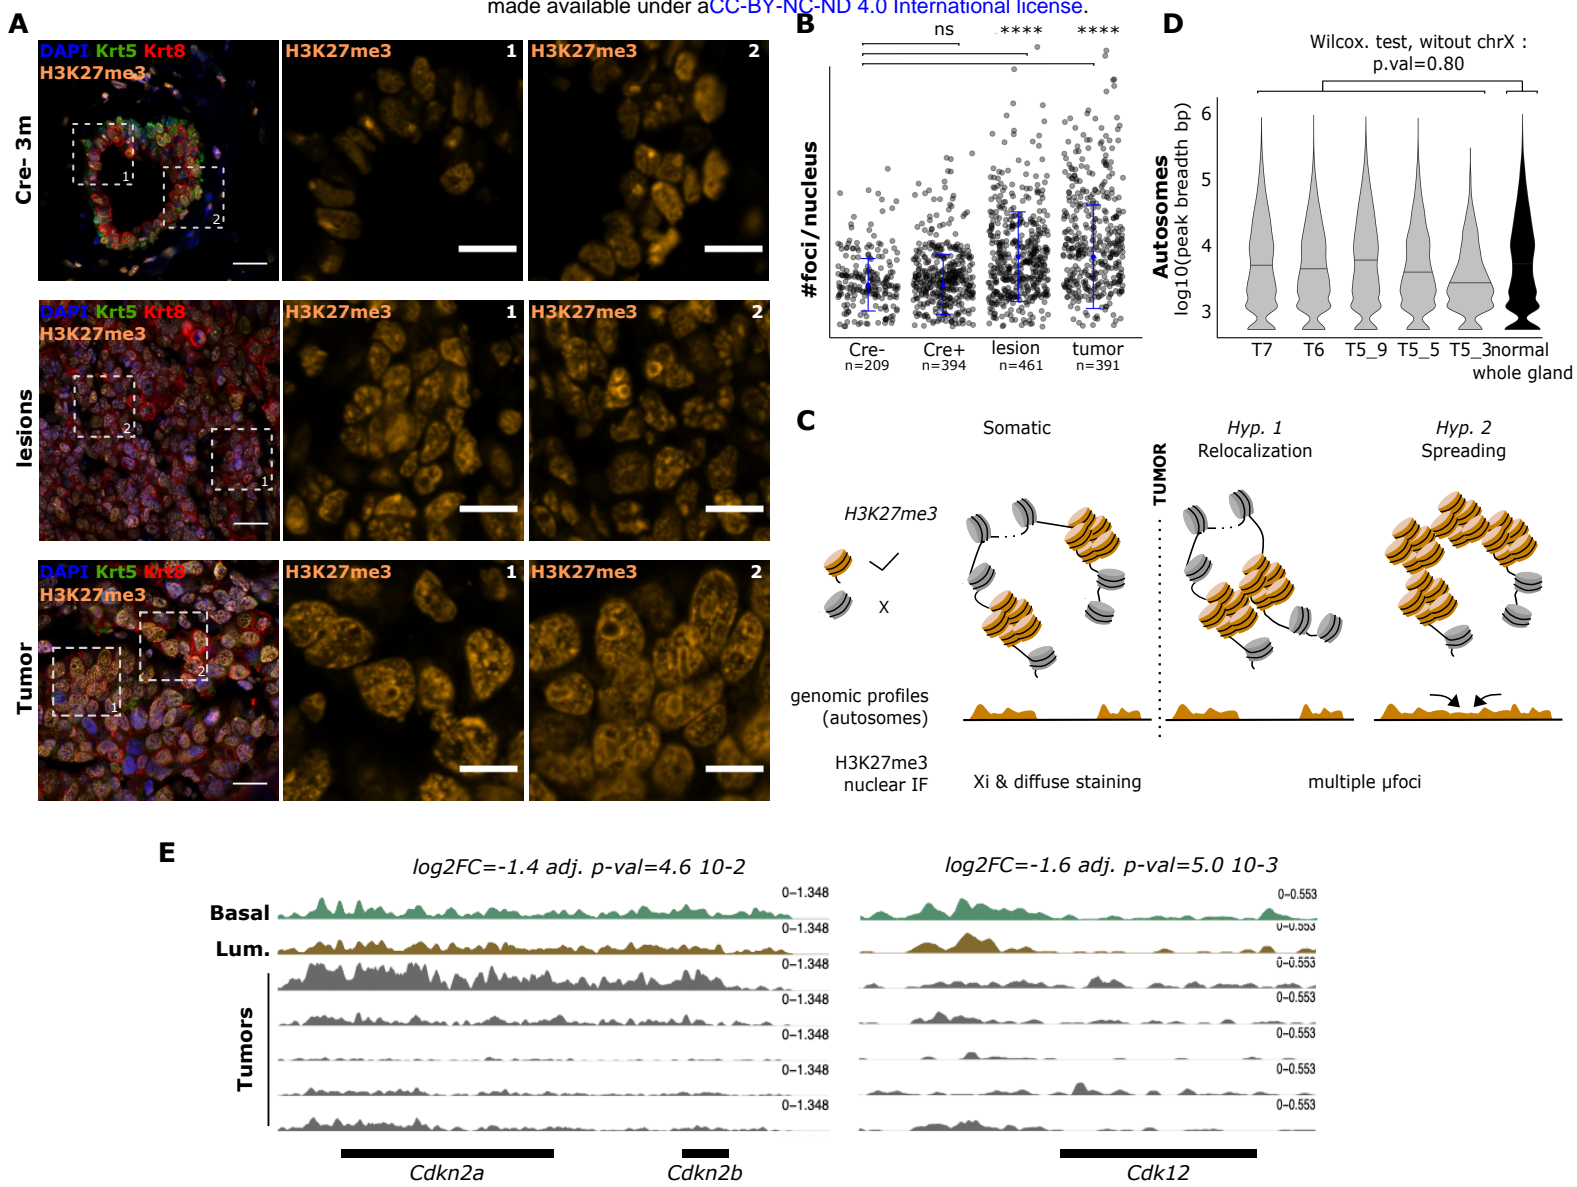

**Figure 6: Heterochromatin disruption.** (A) Representative sections for mammary gland from 3 months-old Cre<sup>-</sup> mouse, 5 months old Cre<sup>+</sup> mouse with lesion, and tumor. All are stained by immunofluorescence for basal marker Krt5 (in green), luminal marker Krt8 (in red), histone mark H3K27me3 (in orange), Dapi (in blue) (left image in each panel), scale bars represent 20µm. For zooms scale bars represent 10µm. (B) Jitter plot representation of the number of µFoci per nucleus in the studied samples in (A). Asterisks represent the significance levels of median comparison with the Cre<sup>-/-</sup> control sample. ns: non-significant, \*P < 0.05, \*\*P < 0.01, \*\*\*P < 0.001. (C) Scheme showing the two hypotheses that could explain the observations of H3K27me3 µfoci. (D) Violin plot of the H3K27me3 peak breadth on autosomes in tumor samples compared to normal-like mammary glands. (E) Cumulative coverage plot for H3K27me3 signal in *Cdkn2a/b*, *Cdk12*, promoter genes in sorted basal and luminal population and tumor samples.

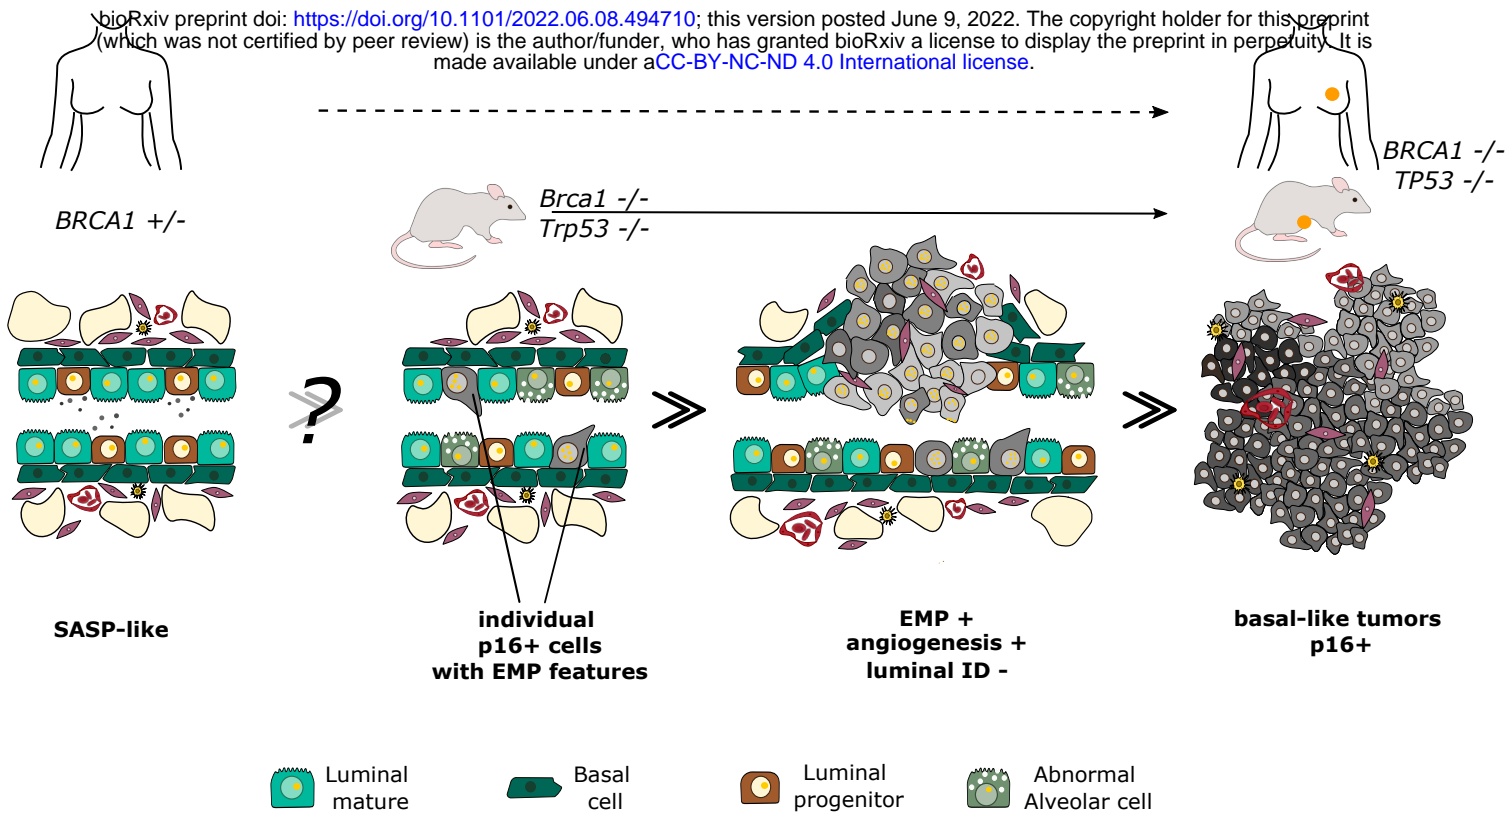

**Figure 7: Understanding early steps of BRCA1 tumorigenesis in mouse and human**

513 **STAR Methods**

514 **Animal models.** The generation of Brca1<sup>fl/fl</sup> and Trp53<sup>fl/fl</sup> mice has been previously described (Jonkers  
515 et al. 2001; Liu et al. 2007). Blg-Cre transgenic mice were purchased from The Jackson Laboratory. Mice  
516 strains were crossed to obtain Blg-Cre Trp53<sup>fl/fl</sup> Brca1<sup>fl/fl</sup> animals. Genotypes were determined by PCR  
517 (primers Cre: 3' CGAGTGATGAGGTTTCGCAAG 5' - 3' TGAGTGAACGAACCTGGTCG 5'; primer Brca1 :  
518 3'TATCACCACTGAATCTCTACC 5' - 3' GACCTCAAACCTCTGAGATCCAC 5'; Trp53: 3'  
519 AAGGGGTATGAGGGACAAGG 5' - 3' GAAGACAGAAAAGGGGAGGG 5'). Mice were sacrificed by cervical  
520 dislocation. For each sample (gland or tumor), one piece was fixed in 4% paraformaldehyde (15710,  
521 Euromedex) for histological analysis, one piece was snap frozen in dry ice and stored at -80°C and one  
522 piece was kept fresh for the desired experimentation.

523

524 **Ethics statement.** All procedures used in the animal experimentations are in accordance with the  
525 European Community Directive (2010/63/EU) for the protection of vertebrate animals. The project has  
526 been approved by the ethics committee n°02265.02. We followed the international recommendations  
527 on containment, replacement and reduction proposed by the Guide for the Care and Use of Laboratory  
528 Animals (NRC 2011). We used as few animals as possible and minimized their suffering, no painful  
529 procedures were performed. The breeding, care and maintenance of the animals were performed by  
530 the Institut Curie animal facility (facility license #C75-05-18).

531

532 **Immunostaining.** Glands and tumors were fixed in 4%PFA/PBS at 4°C overnight, then washed with PBS  
533 (Gibco, 10010023) a first time for 1h and a second time at 4°C overnight. The samples were then passed  
534 through consecutive (50%, 60%, 70%) ethanol baths for 30 min each at room temperature. Paraffin  
535 embedding and sectioning (5µm) was performed by the experimental pathology department of Institut  
536 Curie. At the staining time, the slides are dewaxed by heating at 65°C for 1h and wash 2 times in Xylene  
537 10min, then rehydrated via consecutive bath: 2x Ethanol 100% (VWR 20821,31) 10min, 1x Ethanol 90%  
538 5min, 1x Ethanol 80% 5min, 1x Ethanol 70% 5min, 1x Ethanol 50% 5min, 2x Water 5min. Retrieval

539 treatment was performed by incubation in citrate buffer (C9999) for 20min at 95°C. After a 1h room  
540 temperature cooling, the slides are cleaned in PBS and permeabilized in permeabilization buffer (BSA  
541 2%, FBS 5%, Triton 0,3% in PBS) for 2h at room temperature. Primary Antibody incubation was done  
542 on blocking buffer (BSA 2%, FBS 5%, PBS) at 4°C overnight with Chicken Krt5 antibody 1:500 (905901),  
543 Rat Krt8 antibody 1:500 (MABT329), Rabbit H3K27me3 antibody 1:20 (C36B11), Rabbit p16 antibody  
544 1:100 (Abcam, ab211542). After 3 washes in PBS for 10 min each, incubation of the antibodies was  
545 performed for 2h at room temperature with: goat anti-rabbit Cy3 1:1000 (A10520), goat anti-rat Cy5  
546 1:1000 (A10525), goat anti-chicken Alexa Fluor 488 (A11039) 1:500, DAPI 0,5µg/ml. After 3 wash in  
547 PBS 10min, sections were mounted in Aquapoly mount media.

548

549 **LacZ staining.** Glands and tumors were directly fixed in PFA 4% for 2h and incubated in PBS, 30%  
550 Sucrose at least 24h. Samples were included in optimal cutting temperature OCT medium (23-730-751)  
551 in moulds and cooled on a metal support previously cooled on dry ice. The samples were stored at -  
552 80°C before being cut in a cryostat at -20°C in a 6µm section. Slides were stored at -80°C before use.  
553 For the staining, the slides were equilibrated at room temperature for 10-20 min and washed 3 times  
554 for 5 min at room temperature in the washing buffer: PBS, 2mM MgCl<sub>2</sub>, 1x Na-DOC, 0,02% NP40. After  
555 that, slides were incubated in the LacZ Stain: Washing solution, 10mM K<sub>3</sub>Fe, 10mM K<sub>4</sub>FE, 1,5 mg/ml  
556 X-Gal in a humidified chamber in the dark at 37°C for 4h to overnight. Slides were washed in a  
557 consecutive bath of: PBS for 1 min then for 15 min at room temperature, water for 15 min at room  
558 temperature and (optionally) Nuclear fast red for 5 min and 2 times in water for 5 min each. Sections  
559 were mounted in Aquapoly mount media.

560

561 **Microscopy, image acquisition and analysis.** Image acquisition of stained sections were done using a  
562 laser scanning confocal microscope (LSM780, Carl Zeiss) with a LD LCI PLAN-APO x40 or x65/08 NA oil  
563 objective. The acquisition parameters were: zoom 0.6; pixel size xy 554 nm; spectral emission filters  
564 (bandwidth): 414-485 nm, 490-508 nm, 588-615 nm, 641-735 nm; laser wavelengths: 405, 488, 561

565 and 633 nm. Images were captured using Metamorph. Image processing was performed using Fiji  
566 Software, version 1.0. The counting of  $\mu$ -HF was done in Fiji with a custom macro, for each nucleus, we  
567 selected the most representative Z, then the counting was done automatically with the AutoThreshold  
568 MaxEntropy.

569

570 **Multiplex histological staining.** Multiplexed IHC was performed according to the protocol developed  
571 by (Remark et al. 2016), with some adjustment. Tissues were baked at 60°C for 1h, deparaffinized in  
572 Xylene (Fisher Scientific, 10467270) and rehydrated. The heat-induced epitope retrieval was done with  
573 pH6.1 citrate buffer (Dako, S169984-2) or pH9 EDTA buffer (Dako, S236784-2) in a 95°C water bath for  
574 30 minutes for the first staining (otherwise 15min) followed by incubation in REAL peroxydase blocking  
575 solution (Agilent Dako, S202386-2) for 10 minutes. If the primary antibody was the same species as  
576 any antibody used in prior stains, another blocking step was added with Fab Fragment, only for anti-  
577 rabbit (Jackson ImmunoResearch Europe Ltd, 711-007-003) during 20 minutes. Protein block serum  
578 free (Agilent Dako, X090930-2) was added for 10 minutes. Primary antibody was incubated for 1 or 2  
579 hours at room temperature or overnight at 4°C. The primary antibody was detected using a secondary  
580 antibody directed against the first one, conjugated with horseradish peroxydase (Anti-rabbit: Agilent  
581 Dako, K400311-2) (Anti-rat: BioTechne, VC005-050) followed by chromogenic revelation with 3-amino-  
582 9-ethylcarabazole (AEC) (Agilent Dako, K3468). Slides were counterstained with hematoxylin (Thermo  
583 Scientific, 6765001) and mounted with Glycergel aqueous mounting medium (Dako, C056330-2). After  
584 scanning (Philips Ultra Fast Scanner 1.6 RA), tissues were bleached with ethanol baths and another  
585 cycle was performed starting with the heat induced epitope retrieval.

586

587 **Overlay of multiplex histological stainings.** Histological analysis was performed using the open-source  
588 image analysis QuPath software (QuPath-0.3.2, <http://qupath.github.io/>) (Bankhead et al., n.d.) and  
589 ImageJ/Fiji. We created a new QuPath project containing all scans of each slide which allow us to crop  
590 and export (BioFormats plugin) and then overlay the images using Fiji script following these different

591 steps: 1. Color deconvolution (separation of hematoxylin and AEC signal); 2. Alignment on hematoxylin  
592 images; 3. Creation of transformation matrix on AEC images; 4. For a part of the staining (Edac, Vim,  
593 Ki67) an automatic threshold using MaxEntropy was done to remove background, for the rest of the  
594 stainings (p16, Krt5, Krt8, Ncad) different threshold was determined using control cell signal (cf.  
595 Computational part). Each staining was colored as desired. To further analysis, the composite image  
596 was transferred back to QuPath. By hand, the different structures of the gland/tumors were annotated  
597 (duct, stroma, juxta-lesion or juxta-tumoral duct, lesion, tumor). To identify all the cells, we used the  
598 'cell detection' function based on hematoxylin nucleus staining. We then used the 'show detection  
599 measurement' function to export the annotation and the intensity signal for all staining for each cell  
600 and analyzed it in R.

601

602 **Multiplex histological data analysis strategy.** The resulting measurements were exported and  
603 analyzed in R (4.1.1). Briefly, high signal channels, corresponding to Ki67, Vim were thresholded by the  
604 Maximum Entropy algorithm, whereas the remaining channel markers were subjected to a custom  
605 thresholding approach. To identify true positive cells for each marker, mean "Cell" signal values were  
606 binarized as follows: - non-zero values of the Max Entropy thresholded markers were set to 1, whereas  
607 zero values were set to 0. To determine positive cells for p16, Ncad and Krt5, the local minimum after  
608 the highest peak was fitted on the density distribution of the merged cells from all the samples  
609 corresponding to each marker. Different thresholds were defined for each sample for the following  
610 markers: Krt8 and Ecad. Briefly, the "approxfunc" r interpolation function was applied on the density  
611 distribution of each marker on each sample, followed by an optimization step using the "optimize" r  
612 function to retrieve the local minimum within the interval of the density function. Higher values as  
613 compared to each threshold were set to 1, whereas smaller values were set to 0. basic r functions were  
614 used to calculate the percentages of positive cells for each or double positive for many markers, and  
615 the ggplot package was used for graphical representations. Stromal cells were excluded in the  
616 analyses.



617

618 **Mammary gland / tumor dissociation and flow cytometry.** Samples were cut roughly with dissecting  
619 scissors and then with 2 scalpels for approximative 10 min. Then single cell dissociation was done by  
620 enzymatic digestion with 3mg/ml collagenase I (Roche, 11088793001) and 100U/ml hyaluronidase  
621 (Sigma-Aldrich, H3506) in complete media (HBSS (24020117), 5% SVF) during 1h30 under agitation at  
622 170 rpm at 37°C. Cells were then dissociated in PBS 0,25% Trypsin-Versen (Thermo Fisher Scientific,  
623 15040-033) prewarmed at 37°C for 1min30s with pipetting for 45s. The cell suspension was then  
624 treated with dispase 5 mg/ml (Sigma-Aldrich, D4693) and DNase 0,1 mg/ml (Roche, 11284932001) in  
625 complete media for 5 min at 37°C. A treatment with Red Blood cell lysis buffer (Thermo Fisher  
626 Scientific, 00-4333-57) was carried out then the suspension was filtered at 40µM before counting and  
627 FACS staining. Cell suspensions were stained 20 min in dark at 4°C with anti-CD45-APC 1:100  
628 (BioLegend, 103112), anti-CD31-APC 1:100 (BioLegend, 102510), anti-CD24-BV421 1:50 (BioLegend,  
629 101826), anti-CD49f-PE 1:50 (BioLegend, 313622). Cells were resuspended in cytometry media (PBS,  
630 BSA, EDTA). For the mammary gland samples, we either recovered the total epithelium or the luminal  
631 and basal cells populations separately.

632

633 **Single-cell RNA-seq.** In accordance with the protocol of 10X Chromium manufacture, the cells were  
634 resuspended in PBS 0,04% BSA. Depending on the samples, approximately 3000 or 4000 cells were  
635 loaded on the Chromium Single Cell Controller Instrument (Chromium single cell 3' v3 or 3' NextGem,  
636 10X Genomics, PN-1000075) in accordance with the manufacturer's protocol. Libraries were prepared  
637 according to the same protocol.

638

639 **Bulk and single-cell CHIP-seq.** CHIP experiments were performed as previously described (Marsolier et  
640 al. 2022) using an anti-H3K27me3 antibody (Cell Signaling Technology, 9733 - C36B11). Bulk  
641 sequencing libraries were prepared using the NEBNext Ultra II DNA Library Prep Kit (NEB, E7645S)  
642 according to the manufacturer's instructions. For single-cell experiments, cells were encapsulated on

643 a custom microfluidic device as described before (Grosselin et al. 2019). Cells were stained with DAPI  
644 3 $\mu$ M or with 1 $\mu$ M CFSE during 15 min (CellTrace CFSE, ThermoFisher Scientific, Ref: C34554).

645

## 646 **COMPUTATIONAL ANALYSIS**

647 Code related to the following sections will be deposited on Github (<https://github.com/vallotlab>).

648

649 **Chromium 10X scRNAseq data pre-processing.** scRNAseq data acquisition was performed using the  
650 10X toolkit. Briefly, the CellRanger Software Suite (version 3.0.1) was used for demultiplexing, cell  
651 barcode assignment and further UMI (Unique molecular Identifier) quantification. The pre-built mm10  
652 reference genome proposed by 10X Genomics ([https://support.10xgenomics.com/single-cell-gene-](https://support.10xgenomics.com/single-cell-gene-expression/software/downloads/latest)  
653 [expression/software/downloads/latest](https://support.10xgenomics.com/single-cell-gene-expression/software/downloads/latest)) was used to align the reads. All the *in vivo* mouse datasets  
654 were analyzed together, without performing any batch correction. Doublet removal step was included  
655 in the 10X workflow, and was performed by the “emptyDrops” function from DropletUtils at an FDR of  
656 0.01.

657

658 **Quality Control (QC) for scRNAseq data analysis.** Low quality cells were defined as having aberrant  
659 values for the type and number of genes/UMIs detected. We evaluated the distribution of the total  
660 number of genes, molecules (UMIs) and the fraction of UMIs mapped to mitochondrial (MT) genes and  
661 set up thresholds to filter out those cells. Three upper cutoffs of 30% UMIs mapped to MT genes,  
662 10,000 genes and 100,000 nUMIs were fixed to get rid of outliers. Additionally, cells with less than  
663 1000 detected genes were excluded. This resulted in a total of 17,330 high quality cells, which were  
664 used for further analysis.

665

666

667 **scRNAseq data Normalization.** Normalization and variance stabilization were performed using the  
668 SCTransform method, implemented in the “SCTransform” function from the Seurat Suite. SCTransform  
669 omits the need for heuristic steps comprising log-transformation and pseudo-count addition, and

670 results in improved downstream analytical steps. More recently, SCTransform also supports using the  
671 [glmGamPoi](#) package. Briefly, this method fits a “Gamma-Poisson Generalized Linear Model” to the  
672 overdispersed count matrices due to the high sparsity of the scRNAseq data, and results in a substantial  
673 improvement of the variance stabilization.

674

675 **scRNAseq data dimension reduction and clustering.** Principal Component Analysis (PCA) was  
676 performed on the top 3000 Highly variable genes of the SCT assay from the SCTransform step, to  
677 reduce the data dimensionality. The top 60 PCs were further used to perform graph-based clustering  
678 and community (cell cluster) detection.

679 All the Uniform Manifold Approximation and Projection (UMAP) plots were computed using the  
680 “RunUMAP” Seurat function with default parameters (“uwot” as umap.method, n.neighbours=30,  
681 distance metric= “cosine”, min.dist=0.3) and “random.state=42”. The two-dimensional UMAP  
682 coordinates were calculated using the top 60 PCs previously computed on the SCT assay. For the sake  
683 of clarity, once the epithelial compartment is sub clustered, the same UMAP embeddings were used  
684 to represent the “transitioning cell clusters”. Further “zoom ins” were performed using the  
685 corresponding umap coordinates of the cells of interest.

686

687 **Graph-based clustering and cell cluster identification.** Cell clustering was performed using a two-step  
688 wise approach, using the “FindNeighbours” and “FindClusters” respectively. Briefly, a k-Nearest  
689 Neighbours (kNN) graph is built on the dissimilarity matrix based on the pairwise euclidean distance  
690 between cells in the PCA space (using the previously computed 60 PCs). Edges are drawn between  
691 nodes (cells) with similar expression patterns (Jaccard Similarity). Edge weights are refined based on  
692 their shared overlap in their neighborhood.

693 “FindClusters” function was used to cluster the cells, using the Louvain algorithm as default, setting  
694 the resolution parameter to 1.2 to ensure an optimal granularity and stability of the cell clusters.

695

696 **scRNAseq cluster annotation.** Manual annotation of the cell clusters was performed on the merged  
697 samples on a two-steps basis. First, the cell clusters were annotated according to the major cell  
698 compartments, using well-established canonical markers. The latter included: Immune (*Ptprc+*, *Cd68+*,  
699 *Cd52+*), Epithelial (*Epcam*, *Krt5*, *Krt8*, *Elf5*), Endothelial (*Pecam1*, *Fabp4*, *Apold1*) and Fibroblasts (*Mgp*,  
700 *Dpep1*, *Col3a1*). Briefly, we computed the mean expression of each gene across the cells belonging to  
701 each cluster, to obtain a pseudo-bulked matrix containing only the genes of interest. A classical  
702 hierarchical clustering was performed on the clusters based on their correlation distance matrix to  
703 determine the cell cluster groups “Metaclusters” which displayed similar expression levels for each  
704 canonical gene signature. According to the dendrogram length, computed using the “ward.D” method,  
705 5 meta-clusters were identified. Each meta-cluster was assigned the cell type name for which the  
706 canonical genes were mostly expressed, as compared to the remaining genes. For instance, *COL3a1*  
707 displayed the highest expression level in the meta-cluster “1”. Therefore, all cell clusters previously  
708 defined (see **Graph-based clustering and cell cluster identification** section above) belonging to  
709 metacluster “1” are labelled as “Fibroblasts”.

710

711 **Refined Epithelial clusters annotation.** The epithelial compartment was further sub clustered to better  
712 explore the cell subtype/state heterogeneity between the control and the tumor samples.  
713 SCTransform, PCA dimension reduction and clustering steps were run on the subsetted clusters of  
714 interest. To achieve a high-resolutive cell subtype annotation, Differential expression (DE) was  
715 performed using the “FindAllMarkers” function. Briefly, a non-parametric Wilcoxon-Sum rank test was  
716 performed on a “1 cluster vs all” basis, setting a log<sub>2</sub> Fold Change (FC) threshold at 0.5, and keeping  
717 only genes expressed in at least 30% of the cell clusters (to ensure expression homogeneity within the  
718 cluster). Associated p-values were corrected using the “Bonferroni” correction method, with a set  
719 threshold at 5%.

720 An automated function was designed to annotate the clusters. It takes as input the top 10 log<sub>2</sub>FC ranked  
721 geneset for each cluster, and initially computes the contribution percentage of each tumor size feature

722 of our dataset (control, control with primary lesions, small tumor (ST), medium tumor (MT) and large  
723 tumor (LT)) to each cell cluster. For a given cluster, if the major contributor is the control dataset, the  
724 function intersects the corresponding top genes with a knowledge-driven gene list of the known  
725 epithelial cell types (including basal, luminal progenitor, alveolar-differentiated, hormone-sensing ...)  
726 and labels the cluster with the corresponding cell type. If most of the cells (> 60%) were from tumor  
727 samples, the subtype name would be the concatenation of the top gene name with the tumor size  
728 symbol (ST, MT or LT).

729

730 **Differential expression.** Differential gene expression (DGE) analysis was performed using  
731 “FindMarkers” function. Non parametric Wilcoxon sum rank test was used to identify genes with an  
732  $abs(FC) > 0.5$  at an FDR of 0.05. To ensure cell cluster homogeneity, we set a lower cutoff of 30% of  
733 cells expressing a given gene.

734

735 **Pathway Enrichment Analysis (PEA).** Pathway Enrichment Analysis was performed on the significantly  
736 differentially expressed gene lists using the Hallmark collection from the Molecular Signature Database  
737 (MSigDB). The latter was loaded into the R session using the “msigdb” package available on  
738 Bioconductor. Gene Set Enrichment Analysis was performed using the “enricher” function from the  
739 “msigdb” package. Only significantly enriched pathways (adjusted P-values < 0.05) were considered.

740

741 **Signature construction.** Transcriptional signatures were constructed from the gene lists contributing  
742 to each corresponding enriched pathway, using the “AUCell” package available on Github ( ). Briefly,  
743 the genes of a given cell vs. gene data matrix are ranked based on their expression levels in each cell.  
744 AUCell computes then a Mann-Whitney U statistic (which is similar to AUC Area Under Curve), which is  
745 further used to evaluate gene signatures on the gene expression ranks of individual cells. We  
746 computed the gene signatures using the wrapper function “AddModuleScore\_AUCell”, giving as input a  
747 list of features, along with the seurat object.

748

749 **Trajectory inference - Slingshot.** Pseudotime ordering of cells was conducted using Slingshot (Github  
750 link), with default parameters, giving as input the UMAP coordinates and setting the starting cluster as  
751 the luminal progenitors “LP”, with stretch=2.

752 To ease the interpretation of the trajectory, we performed SLingshot only on the transitioning  
753 compartment, including (“LP”, Alveolar differentiated “Avd”, Luminal differentiated hormone-sensing  
754 “Luminal H-S”, and the annotated clusters of the small tumor. Downstream analytical steps were  
755 performed only on the longest branch starting from the “LP” and ending in the “Fgf8+ ST” cluster.

756

757 **Contribution of genes to a branch tree.** The aim of this section was to identify the most contributing  
758 genes to the transition observed from the Slingshot trajectory inference. To do so, a cell vs.gene  
759 expression matrix was created including the contributing cells to the longest branch, and the top 2000  
760 highly variable genes. We then applied a random forest regression model using 500 trees to predict  
761 the genes which contribute the most to predict pseudotime values (the response variable). The  
762 features (genes) were sorted according to their “variable.importance” parameter after the model was  
763 fit.

764

765 **Associated pathways to pseudotime values prediction.** We computed the mean expression values of  
766 the selected top 200 most important predictive genes to get pseudo-bulked matrices for the  
767 transitioning cells. To cluster the genes according to their profile correlation with pseudotime values,  
768 a pairwise-correlation matrix, followed by a hierarchical clustering were performed. 5 gene groups  
769 were obtained, each having a distinct profile along pseudotime. PEA (see below) was performed on  
770 each gene set, followed by a signature construction step and ultimately visualized on the UMAP  
771 embeddings.

772

773 **Partition-based graph abstraction (PAGA).** PAGA was performed using “scanpy” Python library loaded  
774 on RStudio using “reticulate” R package. Default parameters were used to construct the graph

775 partition, and a threshold of 0.1 was set to preserve the highly connected nodes. Connectivity scores  
776 were extracted from the PAGA output, along with the nodes and edges connections. Centrality scores  
777 (number of edges) were computed by counting the number of edges that passed the cutoff (0.15) for  
778 each cell cluster.

779

780 **Potential of Heat-diffusion for Affinity-based Transition Embedding (PHATE).** PHATE was used as a  
781 visualization method to investigate continual progressions, branches and clusters in our data. Briefly,  
782 PHATE uses an information-geometric distance between cells (data points) to capture both local and  
783 global nonlinear structures, setting  $knn = 20$ ,  $t$  (diffusion parameter) =40 as input parameters.

784

785 **Copy Number Variation (CNV) inference from scRNAseq data.** CNVs were inferred using inferCNV  
786 (<https://github.com/broadinstitute/infercnv>) with default parameters, taking as reference the basal  
787 cells. We extracted residual cell matrices, binarized the values using the 10th as lower and 90th  
788 percentile as higher thresholds, to get -1 (if the value < 10th percentile); +1 (if the value is higher than  
789 the 90th percentile) and 0 if the value is in between the two thresholds. To estimate the percentage  
790 of altered genome, we calculated the absolute value of binarized matrices, and counted the number  
791 of 0s and 1s aggregated by chromosome. These values were added to the metadata of the scRNAseq  
792 Seurat object.

793

794 **TCGA\_Breast cancer dataset.** To compare the expression levels of CDKN2A, P16-signature, EMT and  
795 apoptosis pathway signatures, between non-diseased healthy tissues, tumor-adjacent normal tissue  
796 and tumor breast tissues, we harnessed breast tissues datasets from TCGA and GTEx consortia from  
797 normalized transcriptomic data available from Github  
798 (<https://github.com/mskcc/RNAseqDB/tree/master/data/normalized>). We constructed the gene  
799 signatures using the UCell package, and compared the tissue types using Wilcoxon T tests.

800

801 **scRNAseq data analysis of normal, preneoplastic and tumorigenic states in the human breast.** We  
802 downloaded the dataset from GEO, using the accession number: GSE161529. Briefly, we selected only  
803 the normal epithelium samples from pre-menopausal women (n=6), tumor samples (labeled as Triple  
804 Negative tumor, and Triple negative (Brca) tumor) (ntotal=8), and the nulliparous, pre-menopausal  
805 pre-neoplastic Brca1 samples (n=2). After sample merging, SCT normalization, dimension reduction  
806 and graph-based clustering, we selected the cell clusters expressing epithelial markers (Epcam, Krt8,  
807 Krt5) for further analysis. The same procedure was conducted on the epithelial compartment, followed  
808 by a finer annotation of the cell clusters using canonical markers of epithelial sub-populations. To point  
809 out the epithelial population which underwent major transcriptional modifications upon Brca1  
810 deficiency as compared to the normal population, we subset the luminal progenitor (LP), Basal and  
811 mature luminal (ML) clusters. For each subpopulation, principal component analysis (PCA) was  
812 performed, and the top 20 variable PCs were kept. To identify the main PC drivers of a  
813 normal/preneoplastic gradient, we tested whether the cell distributions along each PC coordinate  
814 were the same, using a Kosmogorov Smirnov nonparametric test. We selected the PCs with a  
815 significant p-value (<0.05) and a D-value > quantile(D-value,0.8). Alternatively, a linear regression  
816 method was tested to select the top predictive PCs to separate cells labeled as preneoplastic from  
817 normal ones. Both methods indicated similar PCs. Next, to identify the epithelial sub-population for  
818 which the PCs were the most discriminant, we ranked the top “informative” PCs according to their  
819 percentage of variance explained. Pathway enrichment analysis was performed on the top genes  
820 (ranked by eigenvalues) which contributed most to the PC part corresponding to preneoplastic cells.

821

## 822 **DATA AVAILABILITY**

823 The datasets described in this study have been deposited in the private GEO repository GSE200444,  
824 accessible with the token gtotisgiftopnqr.

825

## 826 **ACKNOWLEDGMENTS**

827



828 We thank Dr S. Fre for providing critical discussion. We also thank the animal facility, the sequencing  
829 and imaging platforms from Institut Curie. We thank Dr J. Jonkers for providing mouse strains.

830

### 831 **FUNDING**

832

833 This work was supported by the ATIP Avenir program, by Plan Cancer, by the SiRIC-Curie program SiRIC  
834 Grants #INCa-DGOS-4654 and #INCa-DGOS-Inserm\_12554, support from Bettencourt-Schueller  
835 Foundation and by a starting ERC grant from the H2020 program #948528-ChromTrace (CV). High-  
836 throughput sequencing was performed by the ICGex NGS platform of the Institut Curie supported by  
837 the grants Equipex #ANR-10-EQPX-03, by the France Genomique Consortium from the Agence  
838 Nationale de la Recherche #ANR-10-INBS-09-08 ("Investissements d'Avenir" program), by the ITMO-  
839 Cancer Aviesan - Plan Cancer III and by the SiRIC-Curie program SiRIC Grant #INCa-DGOS- 4654.

840

### 841 **DECLARATION OF INTERESTS**

842

843 The authors declare no competing interests.

844

845

846

847

848

849

850

851

852

## 853 REFERENCES

- 854 Aird, Katherine M., and Rugang Zhang. 2013. "Detection of Senescence-Associated Heterochromatin Foci  
855 (SAHF)." *Methods in Molecular Biology* 965: 185–96.
- 856 Ansieau, Stéphane, Jeremy Bastid, Agnès Doreau, Anne-Pierre Morel, Benjamin P. Bouchet, Clémence Thomas,  
857 Frédérique Fauvet, et al. 2008. "Induction of EMT by Twist Proteins as a Collateral Effect of Tumor-  
858 Promoting Inactivation of Premature Senescence." *Cancer Cell* 14 (1): 79–89.
- 859 Bach, Karsten, Sara Pensa, Marta Grzelak, James Hadfield, David J. Adams, John C. Marioni, and Walid T.  
860 Khaled. 2017. "Differentiation Dynamics of Mammary Epithelial Cells Revealed by Single-Cell RNA  
861 Sequencing." *Nature Communications* 8 (1): 2128.
- 862 Bach, Karsten, Sara Pensa, Marija Zarocsinceva, Katarzyna Kania, Julie Stockis, Silvain Pinaud, Kyren A. Lazarus,  
863 et al. 2021. "Time-Resolved Single-Cell Analysis of Brca1 Associated Mammary Tumorigenesis Reveals  
864 Aberrant Differentiation of Luminal Progenitors." *Nature Communications* 12 (1): 1502.
- 865 Bankhead, Peter, Maurice B. Loughrey, José A. Fernández, Yvonne Dombrowski, Darragh G. McArt, Philip D.  
866 Dunne, Stephen McQuaid, et al. n.d. "QuPath: Open Source Software for Digital Pathology Image  
867 Analysis." <https://doi.org/10.1101/099796>.
- 868 Berger, Ashton C., Anil Korkut, Rupa S. Kanchi, Apurva M. Hegde, Walter Lenoir, Wenbin Liu, Yuexin Liu, et al.  
869 2018. "A Comprehensive Pan-Cancer Molecular Study of Gynecologic and Breast Cancers." *Cancer Cell* 33  
870 (4): 690–705.e9.
- 871 Bianchini, Giampaolo, Justin M. Balko, Ingrid A. Mayer, Melinda E. Sanders, and Luca Gianni. 2016. "Triple-  
872 Negative Breast Cancer: Challenges and Opportunities of a Heterogeneous Disease." *Nature Reviews.*  
873 *Clinical Oncology* 13 (11): 674–90.
- 874 Bizhanova, Aizhan, and Paul D. Kaufman. 2021. "Close to the Edge: Heterochromatin at the Nucleolar and  
875 Nuclear Peripheries." *Biochimica et Biophysica Acta (BBA) - Gene Regulatory Mechanisms*.  
876 <https://doi.org/10.1016/j.bbagr.2020.194666>.
- 877 Buj, Raquel, Kelly E. Leon, Marlyn A. Anguelov, and Katherine M. Aird. 2021. "Suppression of p16 Alleviates the  
878 Senescence-Associated Secretory Phenotype." *Aging* 13 (3): 3290–3312.
- 879 Campisi, Judith, and Fabrizio d'Adda di Fagagna. 2007. "Cellular Senescence: When Bad Things Happen to Good  
880 Cells." *Nature Reviews. Molecular Cell Biology* 8 (9): 729–40.
- 881 Cancer Genome Atlas Network. 2012. "Comprehensive Molecular Portraits of Human Breast Tumours." *Nature*  
882 490 (7418): 61–70.
- 883 Cao, Liu, Wenmei Li, Sangsoo Kim, Steven G. Brodie, and Chu-Xia Deng. 2003. "Senescence, Aging, and  
884 Malignant Transformation Mediated by p53 in Mice Lacking the Brca1 Full-Length Isoform." *Genes &*  
885 *Development* 17 (2): 201–13.
- 886 Chakrabarti, Rumela, Julie Hwang, Mario Andres Blanco, Yong Wei, Martin Lukačičin, Rose-Anne Romano,  
887 Kirsten Smalley, et al. 2012. "Elf5 Inhibits the Epithelial–mesenchymal Transition in Mammary Gland  
888 Development and Breast Cancer Metastasis by Transcriptionally Repressing Snail2." *Nature Cell Biology*.  
889 <https://doi.org/10.1038/ncb2607>.
- 890 Chaligné, Ronan, Tatiana Popova, Marco-Antonio Mendoza-Parra, Mohamed-Ashick M. Saleem, David Gentien,  
891 Kristen Ban, Tristan Pilot, et al. 2015. "The Inactive X Chromosome Is Epigenetically Unstable and  
892 Transcriptionally Labile in Breast Cancer." *Genome Research* 25 (4): 488–503.
- 893 Cmarko, D., J. Smigova, L. Minichova, and A. Popov. 2008. "Nucleolus: The Ribosome Factory." *Histology and*  
894 *Histopathology* 23 (10): 1291–98.
- 895 Collado, Manuel, and Manuel Serrano. 2010. "Senescence in Tumours: Evidence from Mice and Humans." *Nature Reviews Cancer*. <https://doi.org/10.1038/nrc2772>.
- 896 Cristea, Simona, and Kornelia Polyak. 2018. "Dissecting the Mammary Gland One Cell at a Time." *Nature*  
897 *Communications*. <https://doi.org/10.1038/s41467-018-04905-2>.
- 898 Di Micco, Raffaella, Valery Krizhanovskiy, Darren Baker, and Fabrizio d'Adda di Fagagna. 2021. "Cellular  
899 Senescence in Ageing: From Mechanisms to Therapeutic Opportunities." *Nature Reviews. Molecular Cell*  
900 *Biology* 22 (2): 75–95.
- 901 Engebraaten, Olav, Hans Kristian Moen Vollan, and Anne-Lise Børresen-Dale. 2013. "Triple-Negative Breast  
902 Cancer and the Need for New Therapeutic Targets." *The American Journal of Pathology*.  
903 <https://doi.org/10.1016/j.ajpath.2013.05.033>.
- 904 Ewald, Jonathan A., Joshua A. Desotelle, George Wilding, and David F. Jarrard. 2010. "Therapy-Induced  
905 Senescence in Cancer." *Journal of the National Cancer Institute* 102 (20): 1536–46.
- 906 Fitsiou, Eleni, Abel Soto-Gamez, and Marco Demaria. 2021. "Biological Functions of Therapy-Induced  
907 Senescence in Cancer." *Seminars in Cancer Biology*. <https://doi.org/10.1016/j.semcancer.2021.03.021>.
- 908

- 909 Fridman, A. L., and M. A. Tainsky. 2008. "Critical Pathways in Cellular Senescence and Immortalization Revealed  
910 by Gene Expression Profiling." *Oncogene* 27 (46): 5975–87.
- 911 Ganesan, Shridar, Daniel P. Silver, Ronny Drapkin, Roger Greenberg, Jean Feunteun, and David M. Livingston.  
912 2004. "Association of BRCA1 with the Inactive X Chromosome and XIST RNA." *Philosophical Transactions  
913 of the Royal Society of London. Series B: Biological Sciences*. <https://doi.org/10.1098/rstb.2003.1371>.
- 914 Gao, Ruli, Alexander Davis, Thomas O. McDonald, Emi Sei, Xiuqing Shi, Yong Wang, Pei-Ching Tsai, et al. 2016.  
915 "Punctuated Copy Number Evolution and Clonal Stasis in Triple-Negative Breast Cancer." *Nature Genetics*  
916 48 (10): 1119–30.
- 917 Gray, G. Kenneth, Carman Man-Chung Li, Jennifer M. Rosenbluth, Laura M. Selfors, Nomeda Girnius, Jia-Ren  
918 Lin, Ron C. J. Schackmann, et al. 2022. "A Human Breast Atlas Integrating Single-Cell Proteomics and  
919 Transcriptomics." *Developmental Cell*, May. <https://doi.org/10.1016/j.devcel.2022.05.003>.
- 920 Gosselin, Kevin, Adeline Durand, Justine Marsolier, Adeline Poitou, Elisabetta Marangoni, Fariba Nemati,  
921 Ahmed Dahmani, et al. 2019. "High-Throughput Single-Cell ChIP-Seq Identifies Heterogeneity of  
922 Chromatin States in Breast Cancer." *Nature Genetics* 51 (6): 1060–66.
- 923 Hanahan, Douglas, and Robert A. Weinberg. 2016. "The Hallmarks of Cancer." *Oxford Textbook of Oncology*.  
924 <https://doi.org/10.1093/med/9780199656103.003.0001>.
- 925 Harada, Takamasa, Joe Swift, Jerome Irianto, Jae-Won Shin, Kyle R. Spinler, Avathamsa Athirasala, Rocky  
926 Diegmiller, P. C. Dave P. Dingal, Irena L. Ivanovska, and Dennis E. Discher. 2014. "Nuclear Lamin Stiffness Is  
927 a Barrier to 3D Migration, but Softness Can Limit Survival." *The Journal of Cell Biology* 204 (5): 669–82.
- 928 Herranz, Nicolás, and Jesús Gil. 2018. "Mechanisms and Functions of Cellular Senescence." *Journal of Clinical  
929 Investigation*. <https://doi.org/10.1172/jci95148>.
- 930 Ito, Takahiro, Yee Voan Teo, Shane A. Evans, Nicola Neretti, and John M. Sedivy. 2018. "Regulation of Cellular  
931 Senescence by Polycomb Chromatin Modifiers through Distinct DNA Damage- and Histone Methylation-  
932 Dependent Pathways." *Cell Reports* 22 (13): 3480–92.
- 933 Jonkers, Jos, Ralph Meuwissen, Hanneke van der Gulden, Hans Peterse, Martin van der Valk, and Anton Berns.  
934 2001. "Synergistic Tumor Suppressor Activity of BRCA2 and p53 in a Conditional Mouse Model for Breast  
935 Cancer." *Nature Genetics*. <https://doi.org/10.1038/ng747>.
- 936 Koppelstaetter, Christian, Gabriele Schratzberger, Paul Perco, Johannes Hofer, Walter Mark, Robert Ollinger,  
937 Rainer Oberbauer, et al. 2008. "Markers of Cellular Senescence in Zero Hour Biopsies Predict Outcome in  
938 Renal Transplantation." *Aging Cell* 7 (4): 491–97.
- 939 Kristiansen, M., G. P. S. Knudsen, P. Maguire, S. Margolin, J. Pedersen, A. Lindblom, and K. H. Ørstavik. 2005.  
940 "High Incidence of Skewed X Chromosome Inactivation in Young Patients with Familial Non-BRCA1/BRCA2  
941 Breast Cancer." *Journal of Medical Genetics* 42 (11): 877–80.
- 942 Lamouille, Samy, Jian Xu, and Rik Derynck. 2014. "Molecular Mechanisms of Epithelial-Mesenchymal  
943 Transition." *Nature Reviews. Molecular Cell Biology* 15 (3): 178–96.
- 944 Liberzon, Arthur, Chet Birger, Helga Thorvaldsdóttir, Mahmoud Ghandi, Jill P. Mesirov, and Pablo Tamayo.  
945 2015. "The Molecular Signatures Database Hallmark Gene Set Collection." *Cell Systems*.  
946 <https://doi.org/10.1016/j.cels.2015.12.004>.
- 947 Lim, Elgene, François Vaillant, Di Wu, Natasha C. Forrest, Bhupinder Pal, Adam H. Hart, Marie-Liesse Asselin-  
948 Labat, et al. 2009. "Aberrant Luminal Progenitors as the Candidate Target Population for Basal Tumor  
949 Development in BRCA1 Mutation Carriers." *Nature Medicine* 15 (8): 907–13.
- 950 Lim, Su Bin, Swee Jin Tan, L. I. M. Wan-Teck, and Chwee Teck Lim. 2017. "An Extracellular Matrix-Related  
951 Prognostic and Predictive Indicator for Early-Stage Non-Small Cell Lung Cancer." *Nature Communications*.  
952 <https://doi.org/10.1038/s41467-017-01430-6>.
- 953 Liu, Xiaoling, Henne Holstege, Hanneke van der Gulden, Marcelle Treur-Mulder, John Zevenhoven, Arno Velds,  
954 Ron M. Kerkhoven, et al. 2007. "Somatic Loss of BRCA1 and p53 in Mice Induces Mammary Tumors with  
955 Features of Human BRCA1-Mutated Basal-like Breast Cancer." *Proceedings of the National Academy of  
956 Sciences of the United States of America* 104 (29): 12111–16.
- 957 Marra, Antonio, Dario Trapani, Giulia Viale, Carmen Criscitiello, and Giuseppe Curigliano. 2020. "Practical  
958 Classification of Triple-Negative Breast Cancer: Intratumoral Heterogeneity, Mechanisms of Drug  
959 Resistance, and Novel Therapies." *NPJ Breast Cancer* 6 (October): 54.
- 960 Marsolier, Justine, Pacôme Prompsy, Adeline Durand, Anne-Marie Lyne, Camille Landragin, Amandine  
961 Trouchet, Sabrina Tenreira Bento, et al. 2022. "H3K27me3 Conditions Chemotolerance in Triple-Negative  
962 Breast Cancer." *Nature Genetics* 54 (4): 459–68.
- 963 Martins, Filipe C., Subhajyoti De, Vanessa Almendro, Mithat Gönen, So Yeon Park, Joanne L. Blum, William  
964 Herlihy, et al. 2012. "Evolutionary Pathways in BRCA1-Associated Breast Tumors." *Cancer Discovery* 2 (6):  
965 503–11.

- 966 Milanovic, Maja, Dorothy N. Y. Fan, Dimitri Belenki, J. Henry M. Däbritz, Zhen Zhao, Yong Yu, Jan R. Dörr, et al.  
967 2018. "Senescence-Associated Reprogramming Promotes Cancer Stemness." *Nature* 553 (7686): 96–100.
- 968 Molyneux, Gemma, Felipe C. Geyer, Fiona-Ann Magnay, Afshan McCarthy, Howard Kendrick, Rachael Natrajan,  
969 Alan MacKay, et al. 2010. "BRCA1 Basal-like Breast Cancers Originate from Luminal Epithelial Progenitors  
970 and Not from Basal Stem Cells." *Cell Stem Cell*. <https://doi.org/10.1016/j.stem.2010.07.010>.
- 971 Moon, Kevin R., David van Dijk, Zheng Wang, Scott Gigante, Daniel B. Burkhardt, William S. Chen, Kristina Yim,  
972 et al. 2019. "Visualizing Structure and Transitions in High-Dimensional Biological Data." *Nature*  
973 *Biotechnology* 37 (12): 1482–92.
- 974 Nallanthighal, Sameera, James Patrick Heiserman, and Dong-Joo Cheon. 2021. "Collagen Type XI Alpha 1  
975 (COL11A1): A Novel Biomarker and a Key Player in Cancer." *Cancers*.  
976 <https://doi.org/10.3390/cancers13050935>.
- 977 Nieto, M. Angela, M. Angela Nieto, Ruby Yun-Ju Huang, Rebecca A. Jackson, and Jean Paul Thiery. 2016. "EMT:  
978 2016." *Cell*. <https://doi.org/10.1016/j.cell.2016.06.028>.
- 979 Onitilo, Adedayo A., Jessica M. Engel, Robert T. Greenlee, and Bickol N. Mukesh. 2009. "Breast Cancer Subtypes  
980 Based on ER/PR and Her2 Expression: Comparison of Clinicopathologic Features and Survival." *Clinical*  
981 *Medicine & Research* 7 (1-2): 4–13.
- 982 Pal, Bhupinder, Toulou Bouras, Wei Shi, François Vaillant, Julie M. Sheridan, Naiyang Fu, Kelsey Breslin, et al.  
983 2013. "Global Changes in the Mammary Epigenome Are Induced by Hormonal Cues and Coordinated by  
984 Ezh2." *Cell Reports* 3 (2): 411–26.
- 985 Pal, Bhupinder, Yunshun Chen, François Vaillant, Bianca D. Capaldo, Rachel Joyce, Xiaoyu Song, Vanessa L.  
986 Bryant, et al. 2021. "A Single-Cell RNA Expression Atlas of Normal, Preneoplastic and Tumorigenic States in  
987 the Human Breast." *The EMBO Journal* 40 (11): e107333.
- 988 Paluvai, Hari Krishnareddy, Eros Di Giorgio, and Claudio Brancolini. 2020. "The Histone Code of Senescence."  
989 *Cells*. <https://doi.org/10.3390/cells9020466>.
- 990 Pastushenko, Ievgenia, Audrey Brisebarre, Alejandro Sifrim, Marco Fioramonti, Tatiana Revenco, Soufiane  
991 Boumahdi, Alexandra Van Keymeulen, et al. 2018. "Identification of the Tumour Transition States  
992 Occurring during EMT." *Nature* 556 (7702): 463–68.
- 993 Patel, A. P., I. Tirosh, J. J. Trombetta, A. K. Shalek, S. M. Gillespie, H. Wakimoto, D. P. Cahill, et al. 2014. "Single-  
994 Cell RNA-Seq Highlights Intratumoral Heterogeneity in Primary Glioblastoma." *Science*.  
995 <https://doi.org/10.1126/science.1254257>.
- 996 Pearce, Oliver M. T., Robin M. Delaine-Smith, Eleni Maniati, Sam Nichols, Jun Wang, Steffen Böhm, Vinothini  
997 Rajeeve, et al. 2018. "Deconstruction of a Metastatic Tumor Microenvironment Reveals a Common Matrix  
998 Response in Human Cancers." *Cancer Discovery*. <https://doi.org/10.1158/2159-8290.cd-17-0284>.
- 999 Pervolarakis, Nicholas, Quy H. Nguyen, Justice Williams, Yanwen Gong, Guadalupe Gutierrez, Peng Sun, Darisha  
1000 Jhutti, et al. 2020. "Integrated Single-Cell Transcriptomics and Chromatin Accessibility Analysis Reveals  
1001 Regulators of Mammary Epithelial Cell Identity." *Cell Reports* 33 (3): 108273.
- 1002 Polak, Paz, Jaegil Kim, Lior Z. Braunstein, Rosa Karlic, Nicholas J. Haradhavala, Grace Tiao, Daniel Rosebrock, et  
1003 al. 2017. "A Mutational Signature Reveals Alterations Underlying Deficient Homologous Recombination  
1004 Repair in Breast Cancer." *Nature Genetics* 49 (10): 1476–86.
- 1005 Probst, Aline V., and Geneviève Almouzni. 2008. "Pericentric Heterochromatin: Dynamic Organization during  
1006 Early Development in Mammals." *Differentiation*. <https://doi.org/10.1111/j.1432-0436.2007.00220.x>.
- 1007 Remark, Romain, Taha Merghoub, Niels Grabe, Geert Litjens, Diane Damotte, Jedd D. Wolchok, Miriam Merad,  
1008 and Sacha Gnjatic. 2016. "In-Depth Tissue Profiling Using Multiplexed Immunohistochemical Consecutive  
1009 Staining on Single Slide." *Science Immunology*. <https://doi.org/10.1126/sciimmunol.aaf6925>.
- 1010 Roupakia, Eugenia, Georgios S. Markopoulos, and Evangelos Kolettas. 2021. "Genes and Pathways Involved in  
1011 Senescence Bypass Identified by Functional Genetic Screens." *Mechanisms of Ageing and Development*  
1012 194 (March): 111432.
- 1013 Scully, R., and D. M. Livingston. 2000. "In Search of the Tumour-Suppressor Functions of BRCA1 and BRCA2."  
1014 *Nature* 408 (6811): 429–32.
- 1015 Sedic, Maja, Adam Skibinski, Nelson Brown, Mercedes Gallardo, Peter Mulligan, Paula Martinez, Patricia J.  
1016 Keller, et al. 2015. "Haploinsufficiency for BRCA1 Leads to Cell-Type-Specific Genomic Instability and  
1017 Premature Senescence." *Nature Communications* 6 (June): 7505.
- 1018 Selbert, S., D. J. Bentley, D. W. Melton, D. Rannie, P. Lourenço, C. J. Watson, and A. R. Clarke. 1998. "Efficient  
1019 BLG-Cre Mediated Gene Deletion in the Mammary Gland." *Transgenic Research* 7 (5): 387–96.
- 1020 Severino, V., N. Alessio, A. Farina, A. Sandomenico, M. Cipollaro, G. Peluso, U. Galderisi, and A. Chambery.  
1021 2013. "Insulin-like Growth Factor Binding Proteins 4 and 7 Released by Senescent Cells Promote  
1022 Premature Senescence in Mesenchymal Stem Cells." *Cell Death & Disease* 4 (November): e911.

- 1023 Sirchia, Silvia M., Lisetta Ramoscelli, Francesca R. Grati, Floriana Barbera, Danila Coradini, Franca Rossella,  
1024 Giovanni Porta, et al. 2005. "Loss of the Inactive X Chromosome and Replication of the Active X in BRCA1-  
1025 Defective and Wild-Type Breast Cancer Cells." *Cancer Research* 65 (6): 2139–46.
- 1026 Stefansson, Olafur Andri, Jon Gunnlaugur Jonasson, Kristrun Olafsdottir, Holmfridur Hilmarsdottir, Gudridur  
1027 Olafsdottir, Manel Esteller, Oskar Thor Johannsson, and Jorunn Erla Eyfjord. 2011. "CpG Island  
1028 Hypermethylation of BRCA1 and Loss of pRb as Co-Occurring Events in Basal/triple-Negative Breast  
1029 Cancer." *Epigenetics: Official Journal of the DNA Methylation Society* 6 (5): 638–49.
- 1030 Stone, Caroline, Nuala McCabe, and Alan Ashworth. 2003. "X-Chromosome Inactivation: X Marks the Spot for  
1031 BRCA1." *Current Biology: CB* 13 (2): R63–64.
- 1032 Street, Kelly, Davide Risso, Russell B. Fletcher, Diya Das, John Ngai, Nir Yosef, Elizabeth Purdom, and Sandrine  
1033 Dudoit. 2018. "Slingshot: Cell Lineage and Pseudotime Inference for Single-Cell Transcriptomics." *BMC  
1034 Genomics* 19 (1): 477.
- 1035 Timms, Kirsten M., Victor Abkevich, Elisha Hughes, Chris Neff, Julia Reid, Brian Morris, Saritha Kalva, et al. 2014.  
1036 "Association of BRCA1/2 defects with Genomic Scores Predictive of DNA Damage Repair Deficiency among  
1037 Breast Cancer Subtypes." *Breast Cancer Research*. <https://doi.org/10.1186/s13058-014-0475-x>.
- 1038 Vincent-Salomon, Anne, Carine Ganem-Elbaz, Elodie Manié, Virginie Raynal, Xavier Sastre-Garau, Dominique  
1039 Stoppa-Lyonnet, Marc-Henri Stern, and Edith Heard. 2007. "X Inactive-Specific Transcript RNA Coating and  
1040 Genetic Instability of the X Chromosome in BRCA1 Breast Tumors." *Cancer Research*.  
1041 <https://doi.org/10.1158/0008-5472.can-07-0465>.
- 1042 Visvader, Jane E., and John Stingl. 2014. "Mammary Stem Cells and the Differentiation Hierarchy: Current  
1043 Status and Perspectives." *Genes & Development* 28 (11): 1143–58.
- 1044 Watson, Christine J., and Walid T. Khaled. 2008. "Mammary Development in the Embryo and Adult: A Journey  
1045 of Morphogenesis and Commitment." *Development* 135 (6): 995–1003.
- 1046 Wolf, F. Alexander, Fiona K. Hamey, Mireya Plass, Jordi Solana, Joakim S. Dahlin, Berthold Göttgens, Nikolaus  
1047 Rajewsky, Lukas Simon, and Fabian J. Theis. 2019. "PAGA: Graph Abstraction Reconciles Clustering with  
1048 Trajectory Inference through a Topology Preserving Map of Single Cells." *Genome Biology* 20 (1): 59.
- 1049 Yang, Jing, Parker Antin, Geert Berx, Cédric Blanpain, Thomas Brabletz, Marianne Bronner, Kyra Campbell, et al.  
1050 2020. "Guidelines and Definitions for Research on Epithelial-Mesenchymal Transition." *Nature Reviews.  
1051 Molecular Cell Biology* 21 (6): 341–52.
- 1052 Yochum, Zachary A., Jessica Cades, Lucia Mazzacurati, Neil M. Neumann, Susheel K. Khetarpal, Suman  
1053 Chatterjee, Hailun Wang, et al. 2017. "A First-in-Class TWIST1 Inhibitor with Activity in Oncogene-Driven  
1054 Lung Cancer." *Molecular Cancer Research*. <https://doi.org/10.1158/1541-7786.mcr-17-0298>.
- 1055 Zhang, Yun, Joana Liu Donaher, Sunny Das, Xin Li, Ferenc Reinhardt, Jordan A. Krall, Arthur W. Lambert, et al.  
1056 2022. "Genome-Wide CRISPR Screen Identifies PRC2 and KMT2D-COMPASS as Regulators of Distinct EMT  
1057 Trajectories That Contribute Differentially to Metastasis." *Nature Cell Biology* 24 (4): 554–64.

1058
